# Supplementary material
Source: publisher figshare collection journal article supplement (https://acs.figshare.com/ndownloader/files/25559792)
Supplement: Supplementary file 1 [file 25559792]

## Supporting Information

for

# Mechanochemical Synthesis of 1,2,6-Thiadiazine 1-Oxides from Sulfonimidamides and the Fluorescence Properties of the Products

Jan-Hendrik Schöbel,<sup>†</sup> Wenjing Liang,<sup>‡</sup> Dominik Wöll,<sup>‡</sup> and Carsten Bolm<sup>†,\*</sup>

<sup>†</sup> Institute of Organic Chemistry, RWTH Aachen University, Landoltweg 1, 52074 Aachen, Germany

<sup>‡</sup> Institute of Physical Chemistry, RWTH Aachen University, Landoltweg 2, 52074 Aachen, Germany

E-Mail: Carsten.Bolm@oc.rwth-aachen.de

## Table of Content

| Section                     | Page |
|-----------------------------|------|
| 1. Ball mill equipment      | S2   |
| 2. NMR spectra              | S3   |
| 3. Photophysical properties | S19  |
| 4. References               | S20  |

## 1. Ball mill equipment

The mechanochemical reactions were carried out in a RETSCH Mixer Mill MM 400. Reactions on a 1 mmol scale were performed in stainless steel milling vessels (10 mL volumetric capacity) with three stainless steel milling balls (7 mm in diameter). All other mechanochemical reactions were done in stainless steel milling vessels (5 mL volumetric capacity) and two stainless steel milling balls (7 mm in diameter).

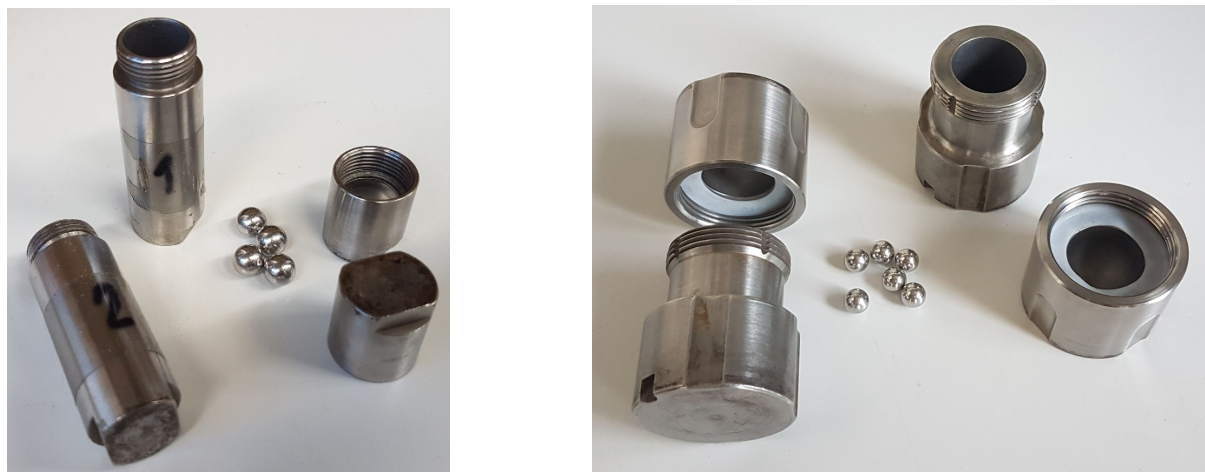

**Figure S1.** Stainless steel milling vessels used in mechanochemical reactions; left: 5 mL, right: 10 mL.

## 2. NMR spectra

$^1\text{H}$  NMR (400 MHz,  $\text{CDCl}_3$ ) spectrum of compound **3aa**

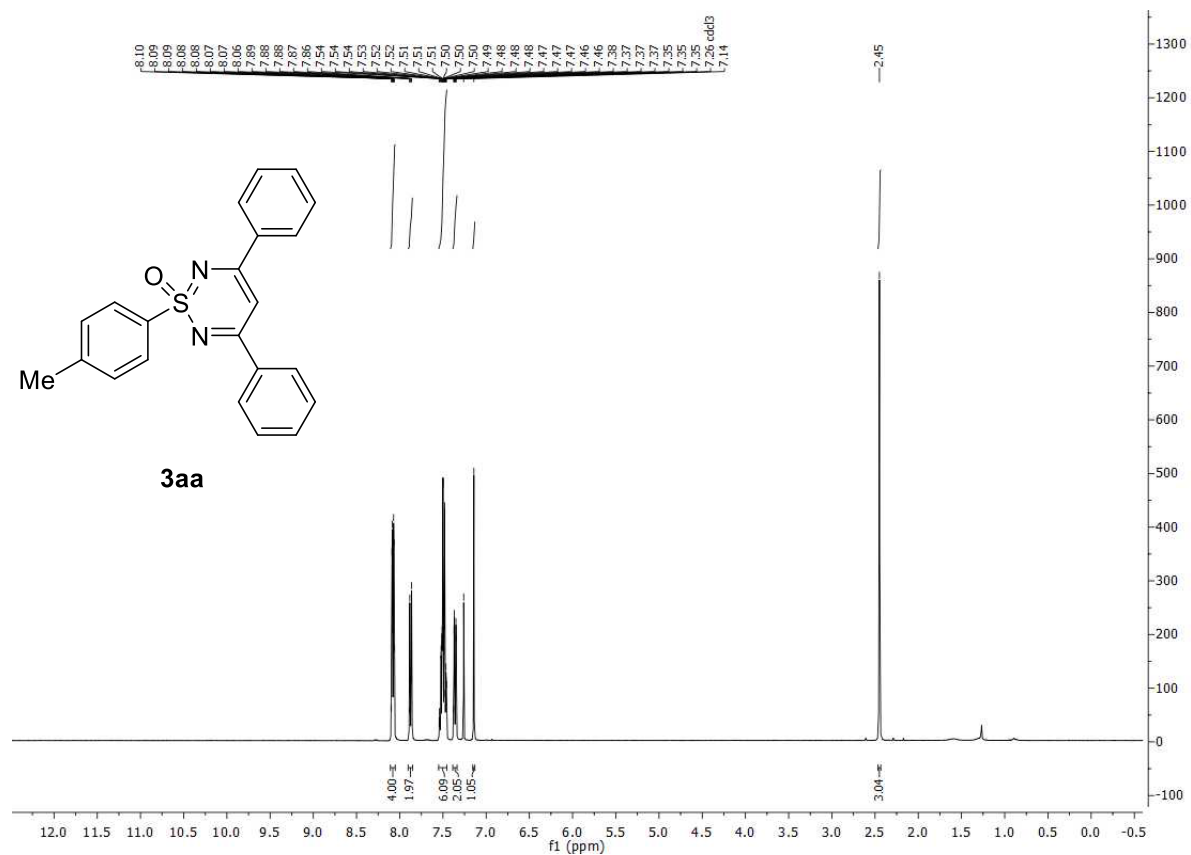

$^{13}\text{C}\{^1\text{H}\}$  NMR (101 MHz,  $\text{CDCl}_3$ ) spectrum of compound **3aa**

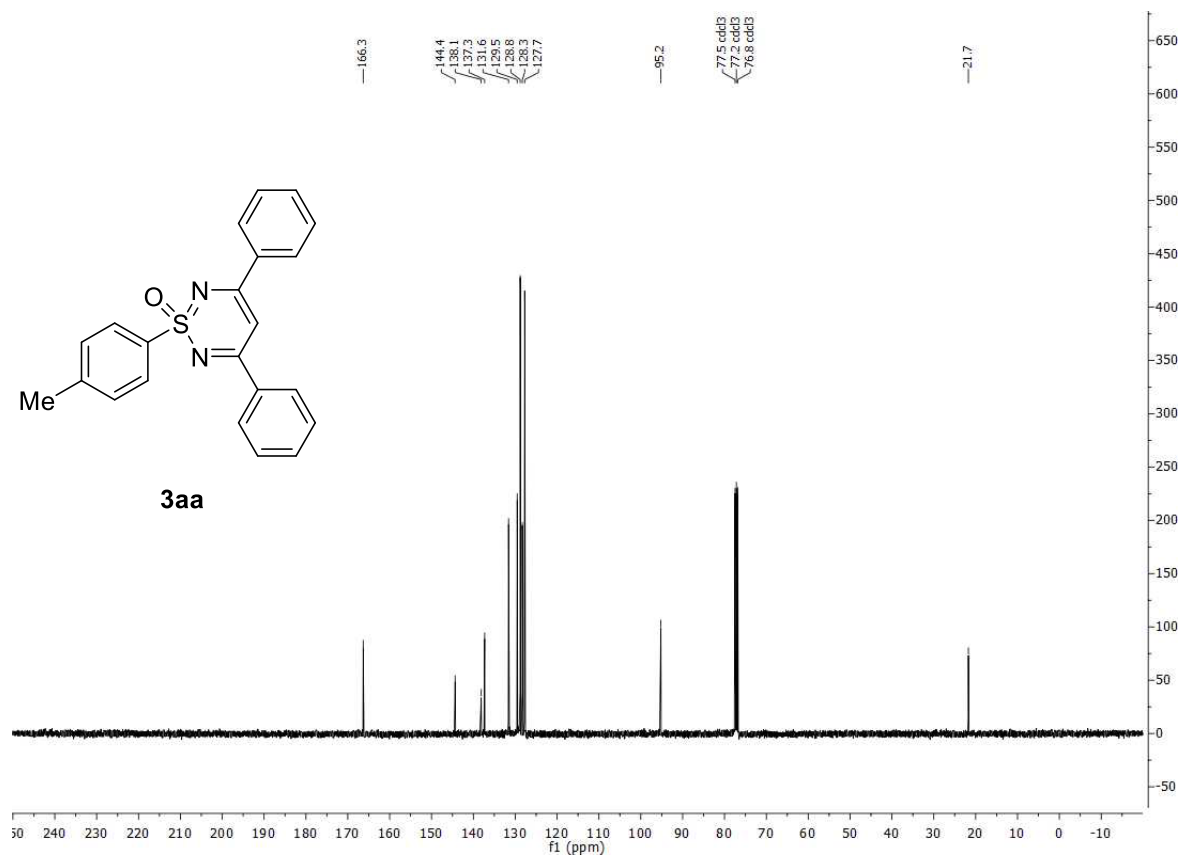

$^1\text{H}$  NMR (600 MHz,  $\text{CDCl}_3$ ) spectrum of compound **3ab**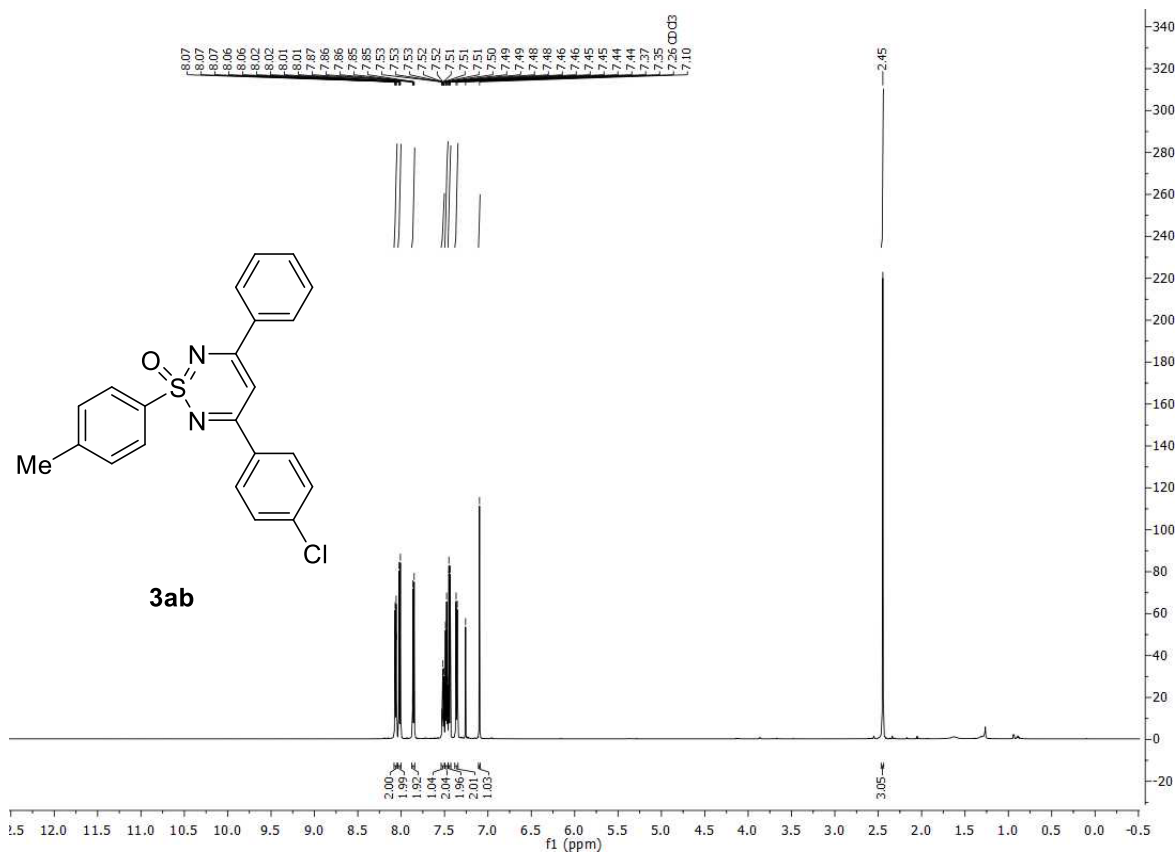 $^{13}\text{C}\{^1\text{H}\}$  NMR (151 MHz,  $\text{CDCl}_3$ ) spectrum of compound **3ab**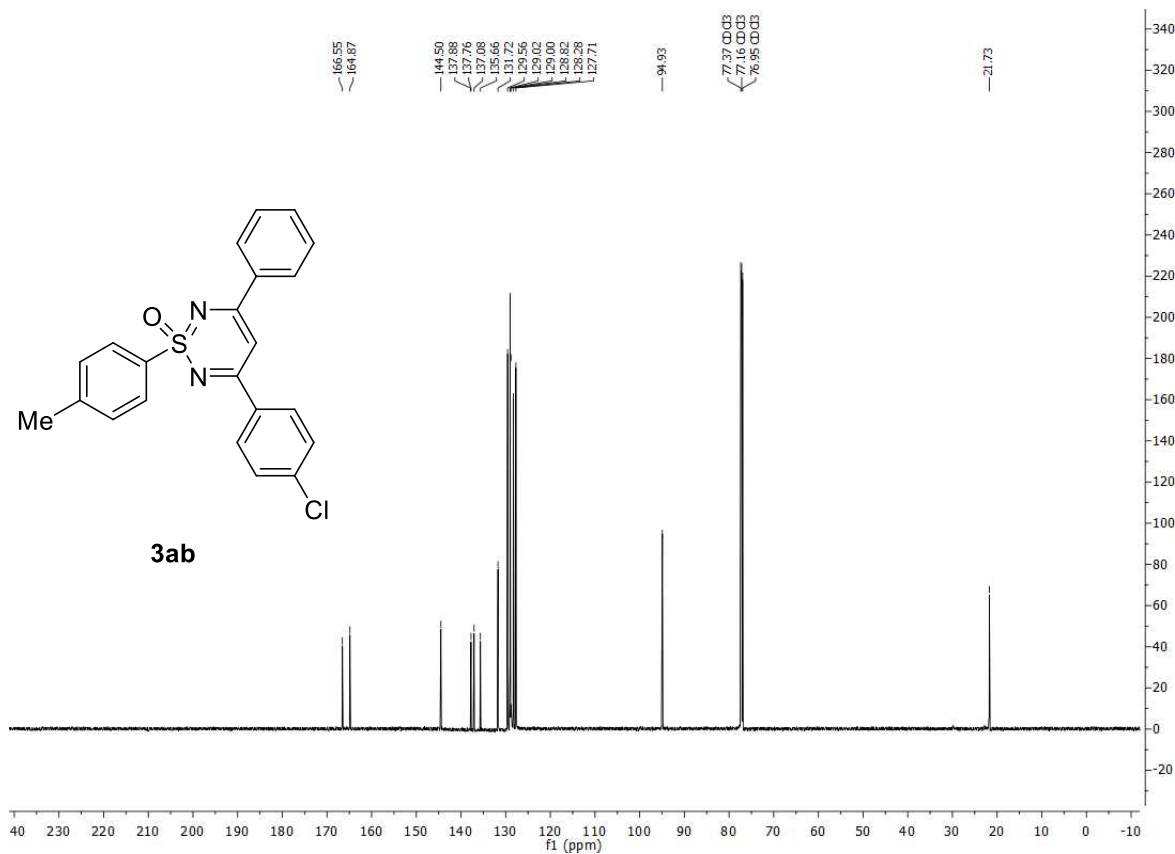

$^1\text{H}$  NMR (600 MHz,  $\text{CDCl}_3$ ) spectrum of compound **3ac**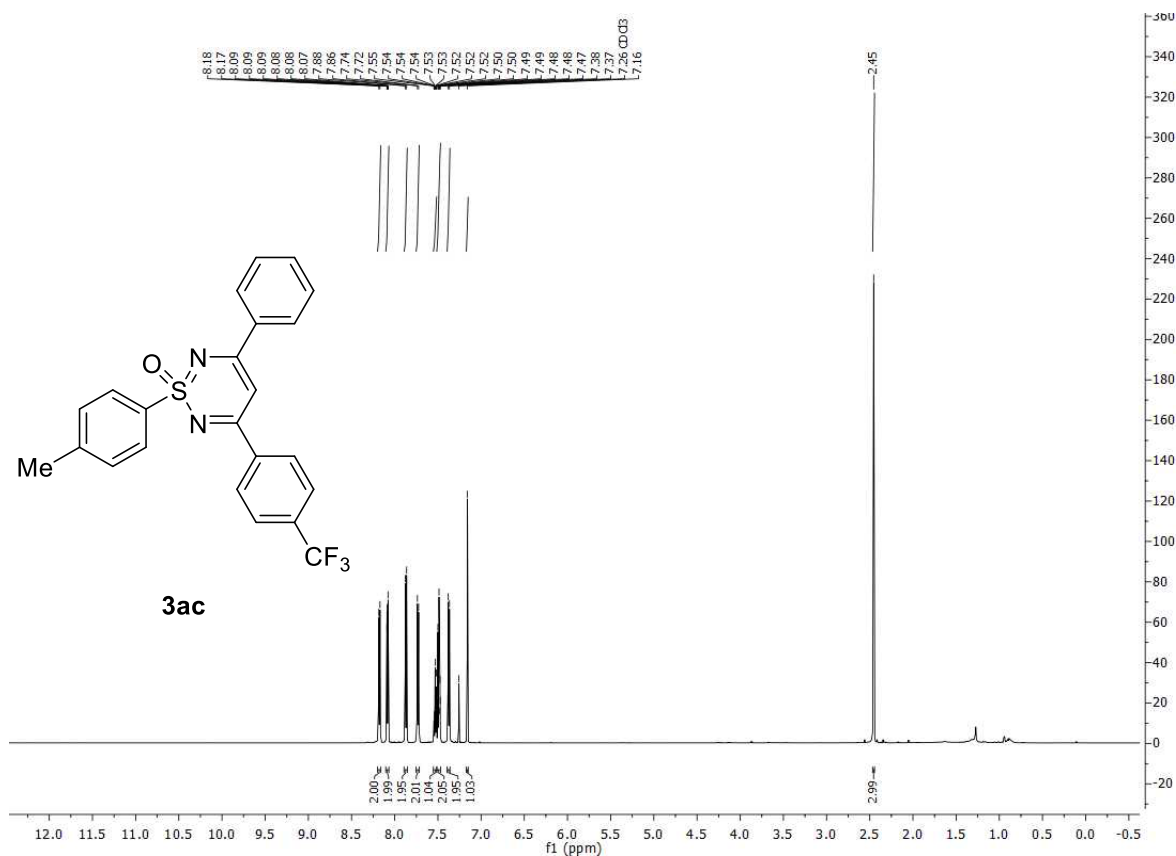 $^{13}\text{C}\{^1\text{H}\}$  NMR (151 MHz,  $\text{CDCl}_3$ ) spectrum of compound **3ac**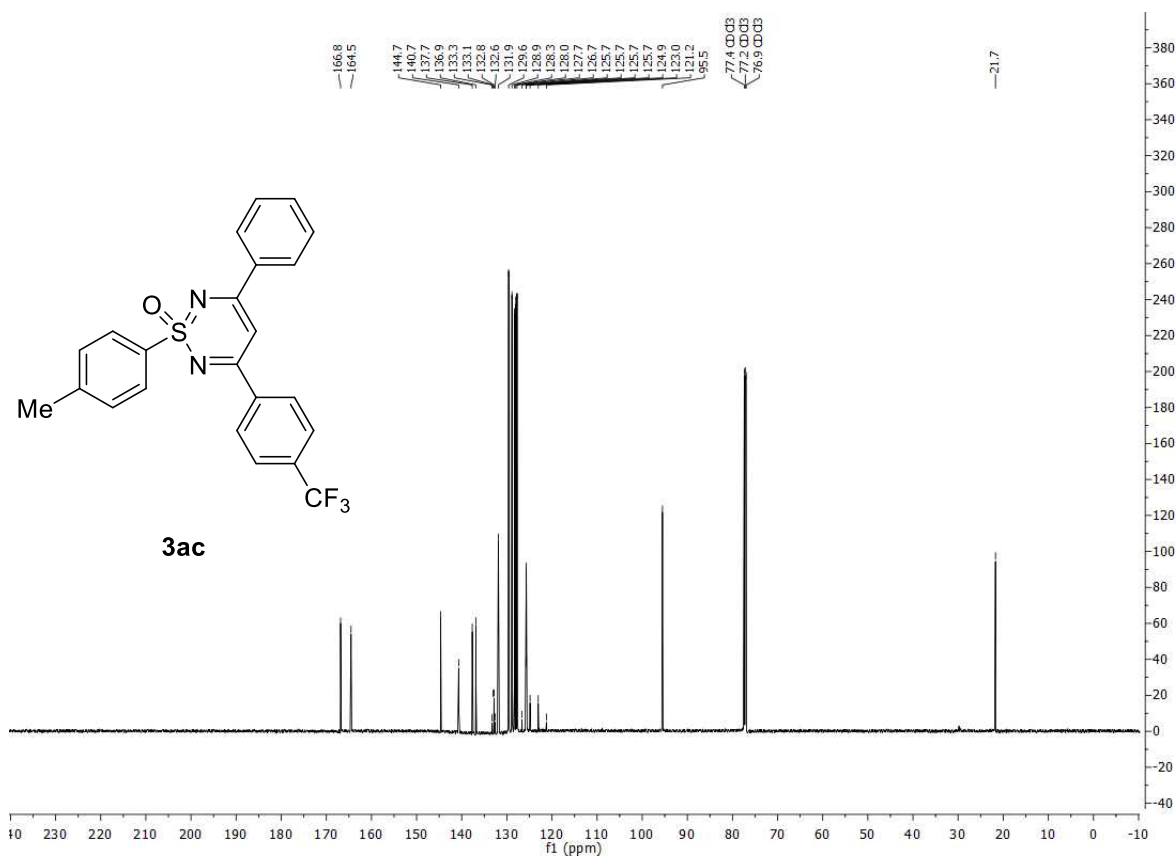

$^{19}\text{F}$  NMR (376 MHz,  $\text{CDCl}_3$ ) spectrum of compound **3ac**

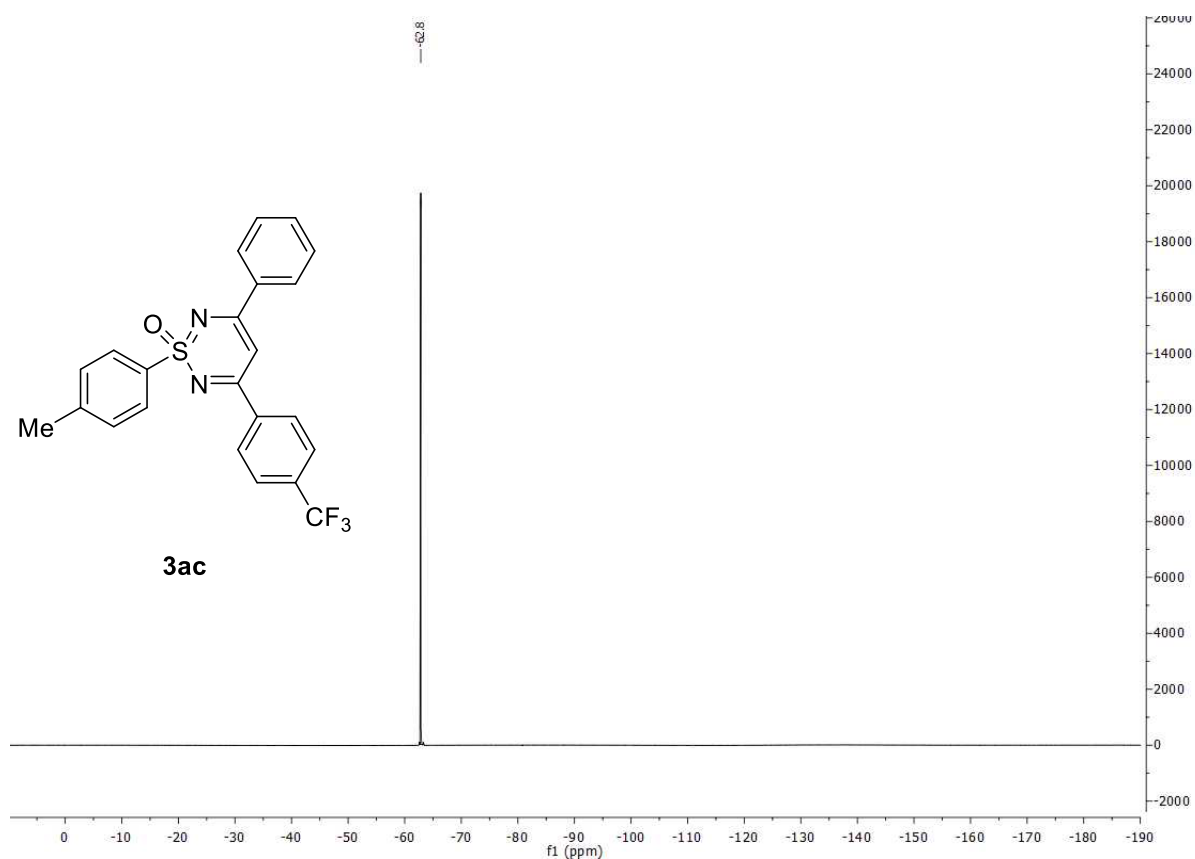

$^1\text{H}$  NMR (600 MHz,  $\text{CDCl}_3$ ) spectrum of compound **3ad**

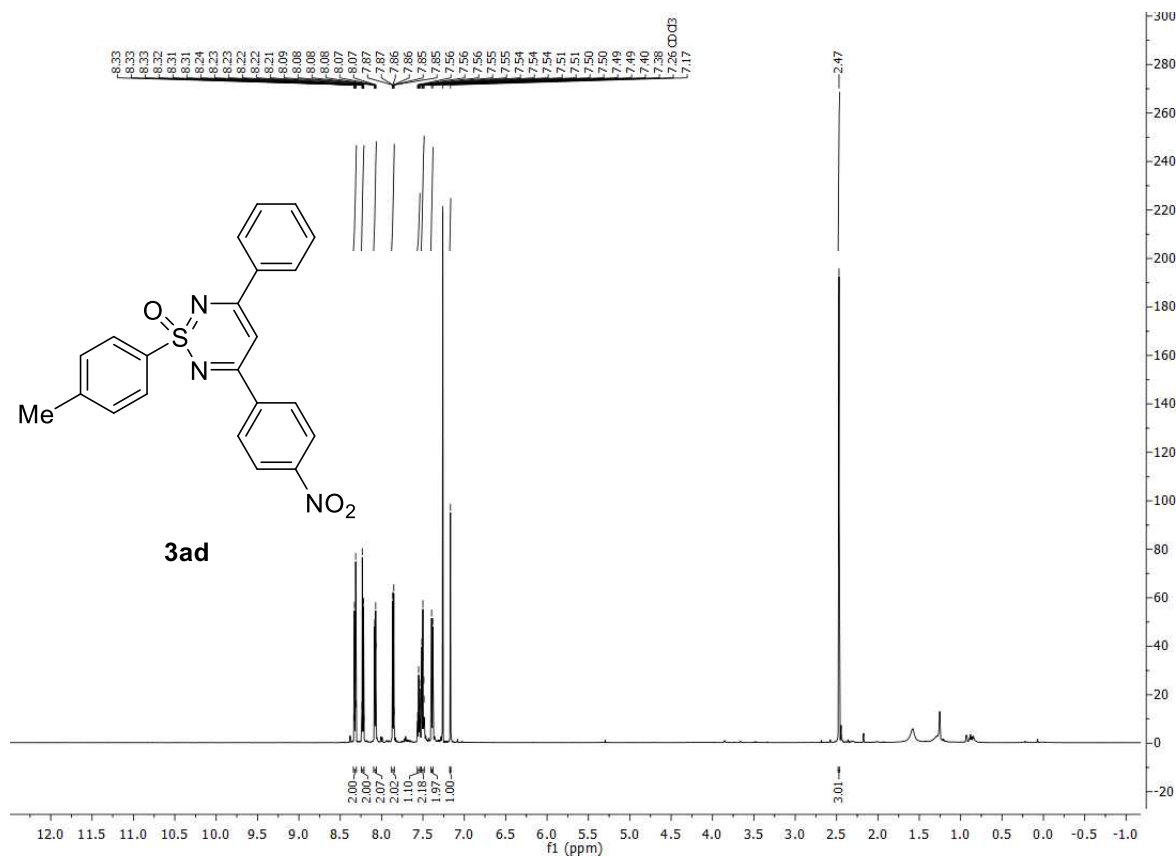

$^{13}\text{C}\{^1\text{H}\}$  NMR (151 MHz,  $\text{CDCl}_3$ ) spectrum of compound **3ad**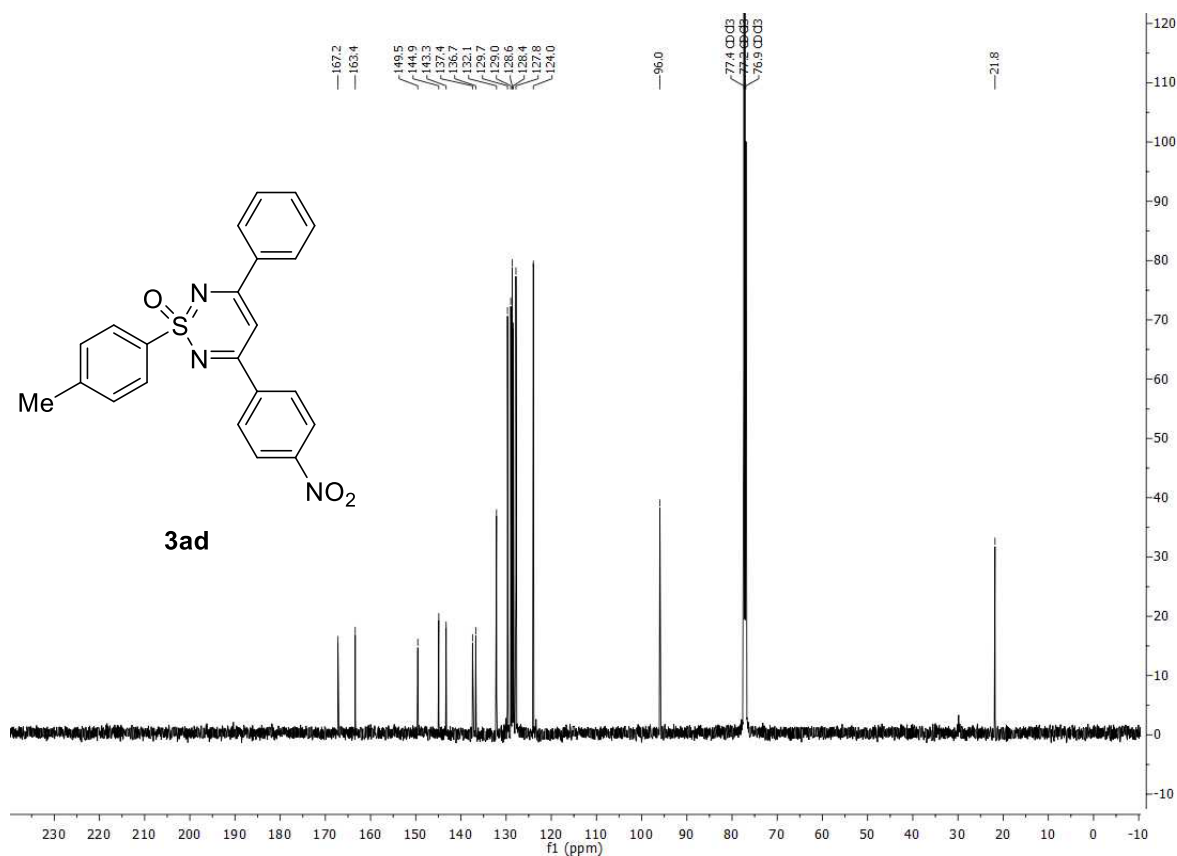 $^1\text{H}$  NMR (400 MHz,  $\text{CDCl}_3$ ) spectrum of compound **3ae**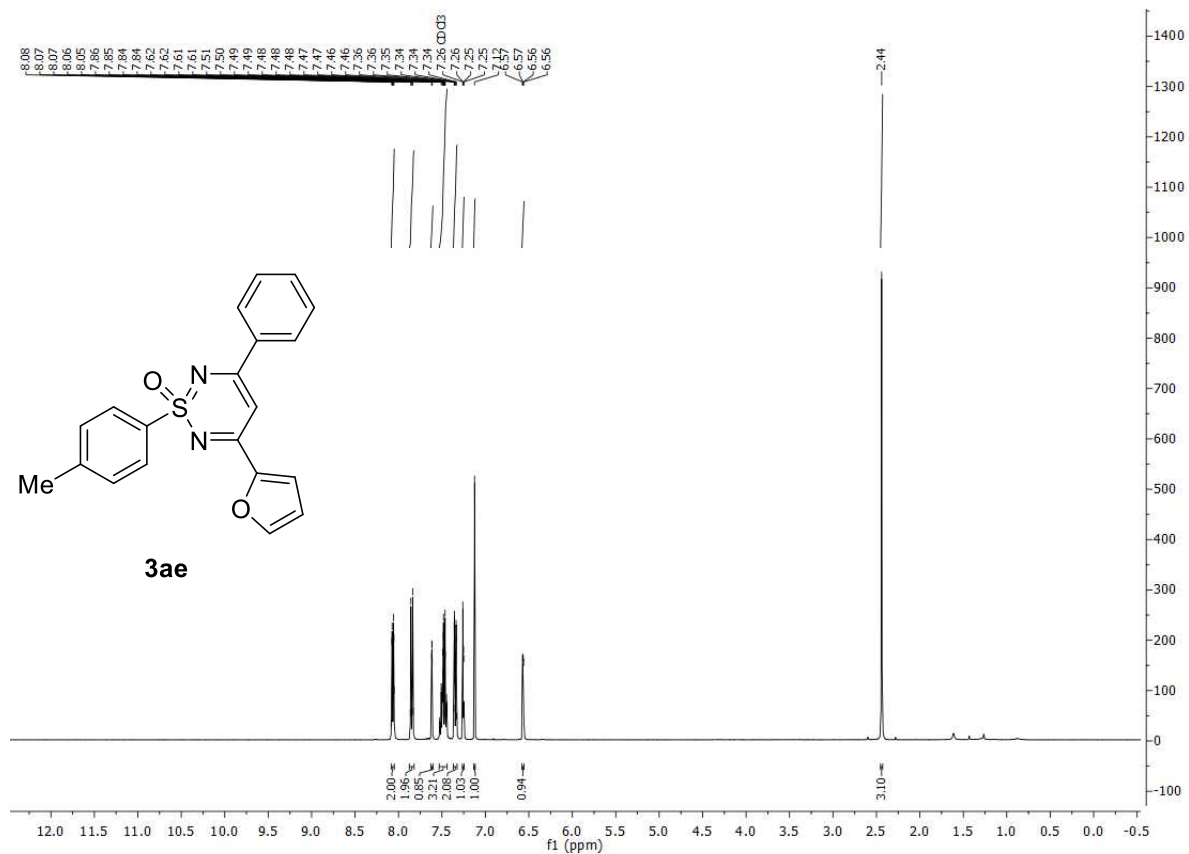

$^{13}\text{C}\{^1\text{H}\}$  NMR (101 MHz,  $\text{CDCl}_3$ ) spectrum of compound **3ae**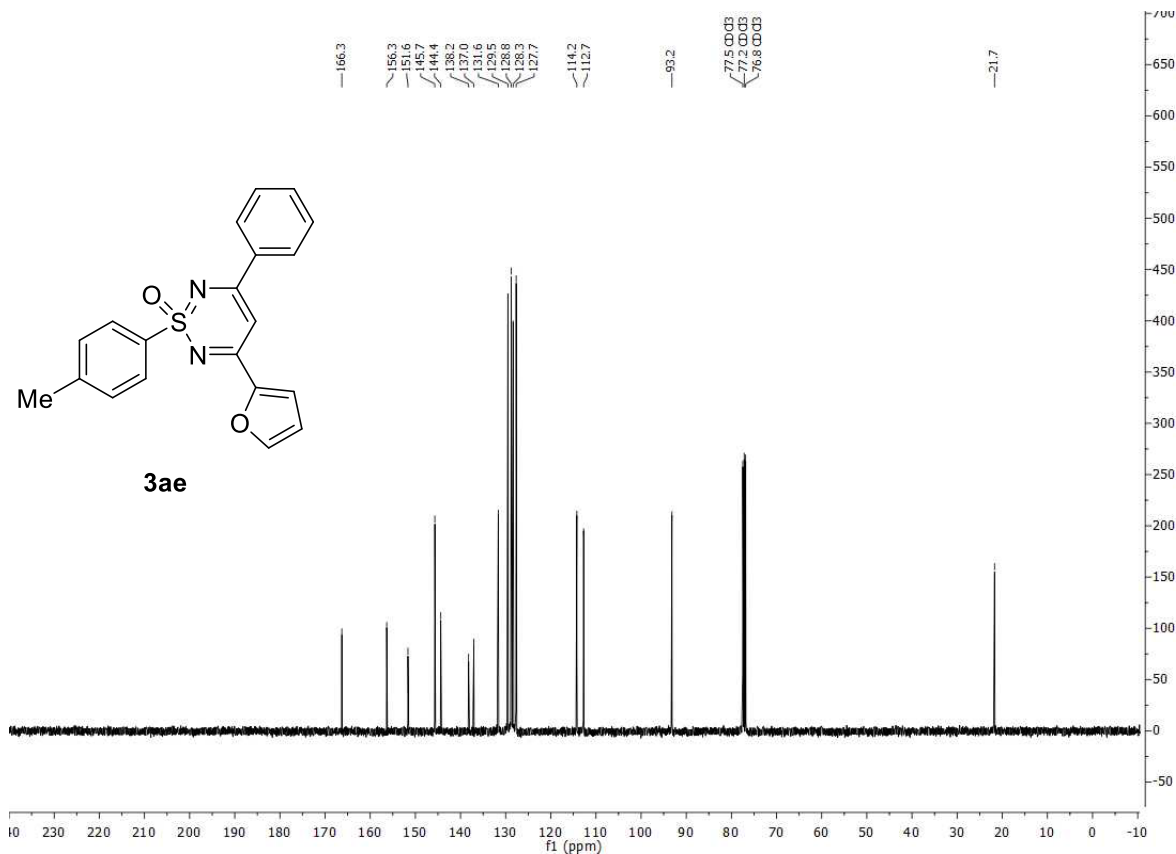 $^1\text{H}$  NMR (600 MHz,  $\text{CDCl}_3$ ) spectrum of compound **3af**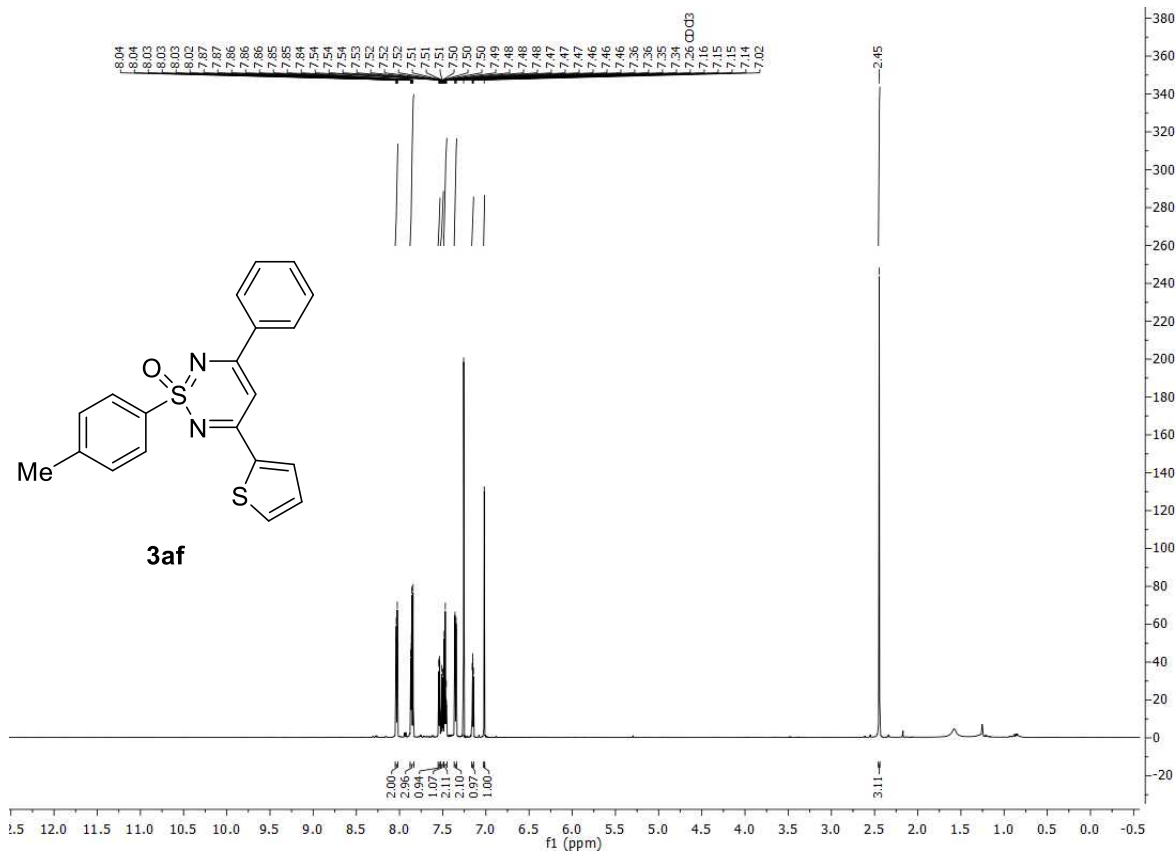

$^{13}\text{C}\{^1\text{H}\}$  NMR (151 MHz,  $\text{CDCl}_3$ ) spectrum of compound **3af**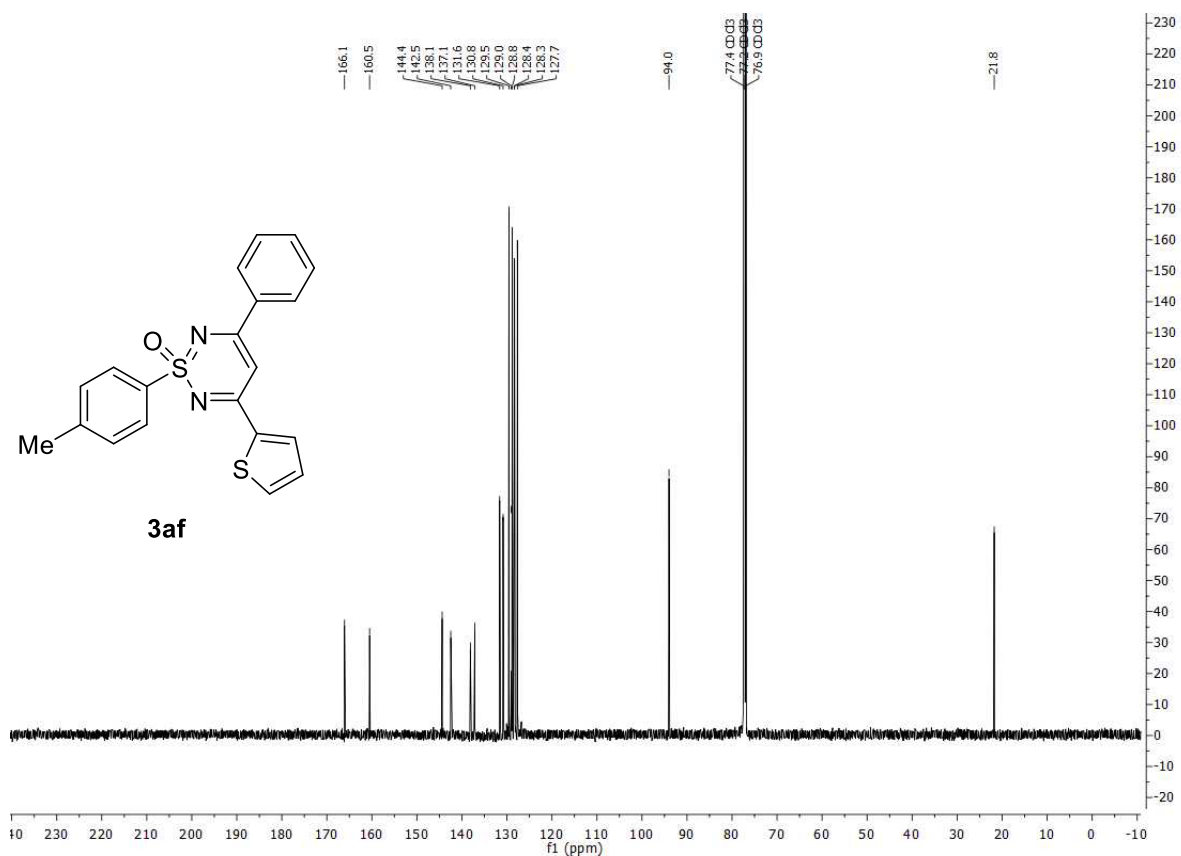 $^1\text{H}$  NMR (400 MHz,  $\text{CDCl}_3$ ) spectrum of compound **3ag**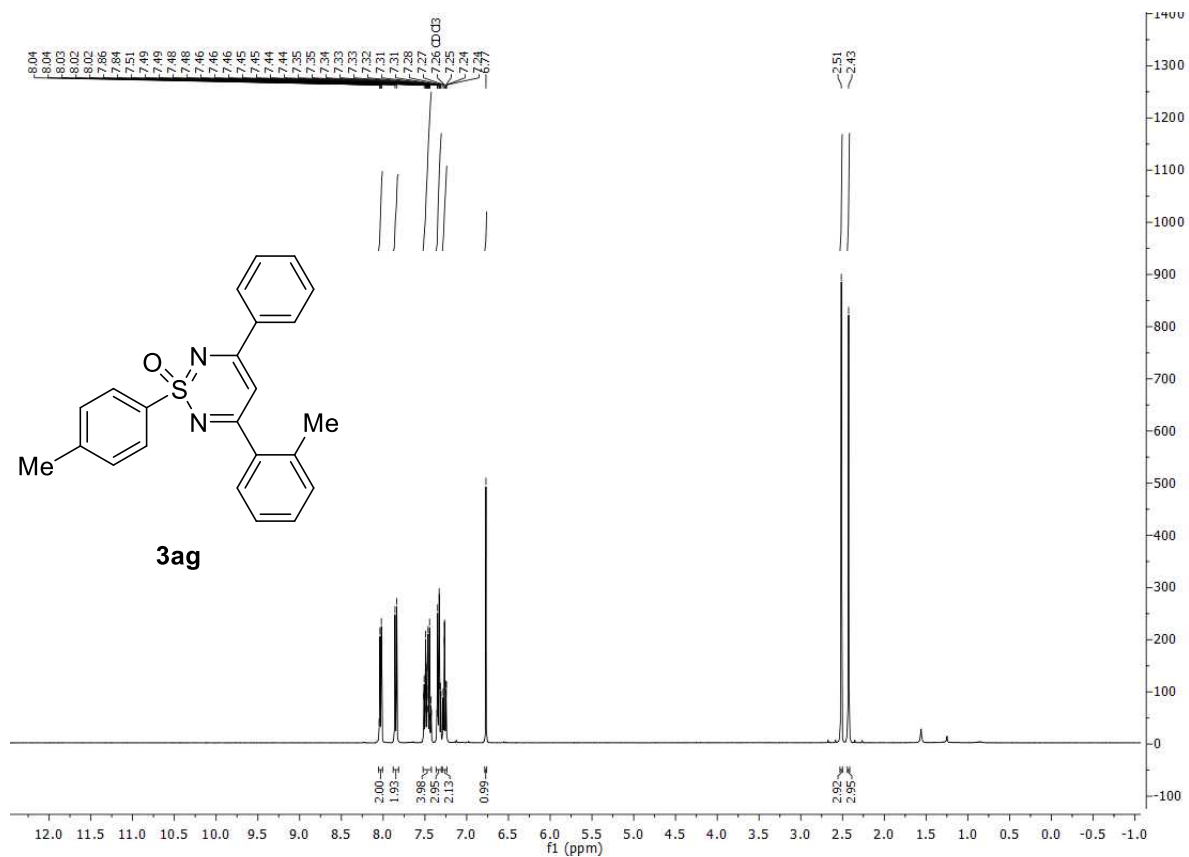

$^{13}\text{C}\{^1\text{H}\}$  NMR (101 MHz,  $\text{CDCl}_3$ ) spectrum of compound **3ag**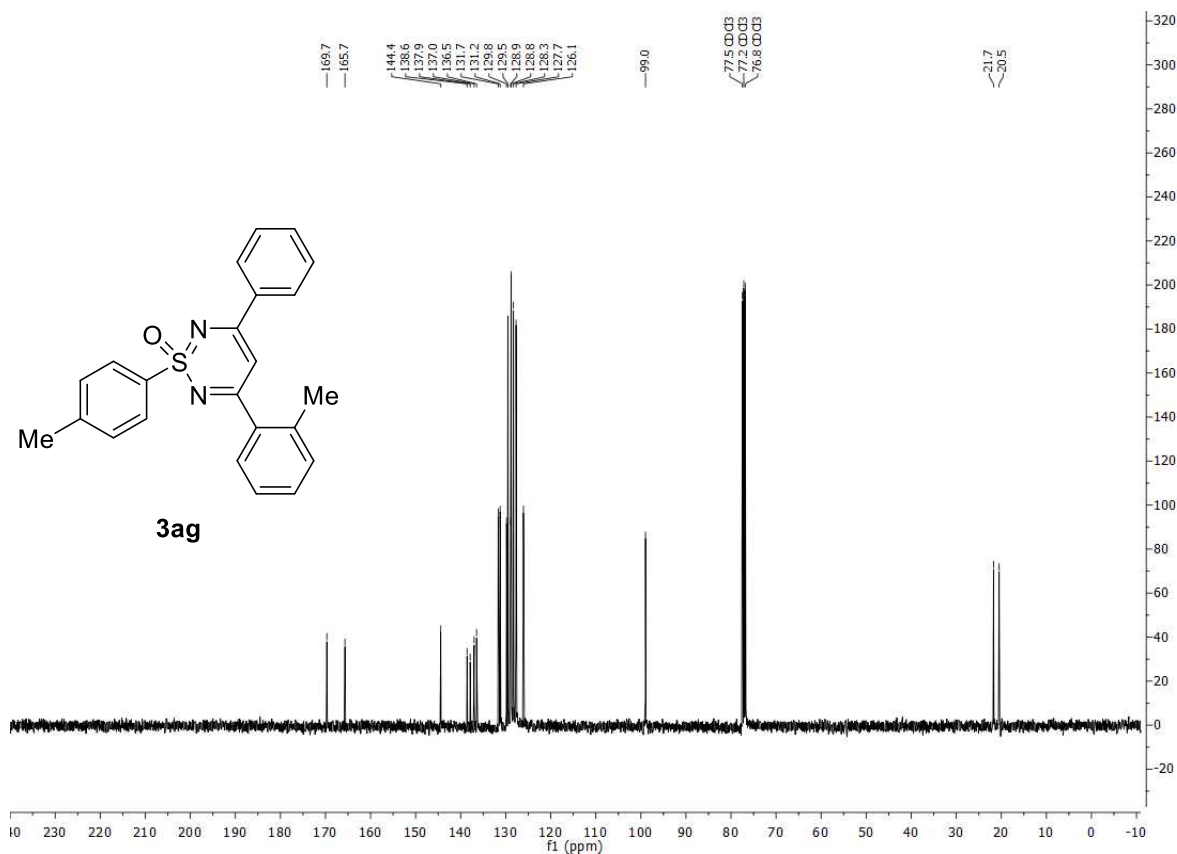 $^1\text{H}$  NMR (600 MHz,  $\text{CDCl}_3$ ) spectrum of compound **3ah**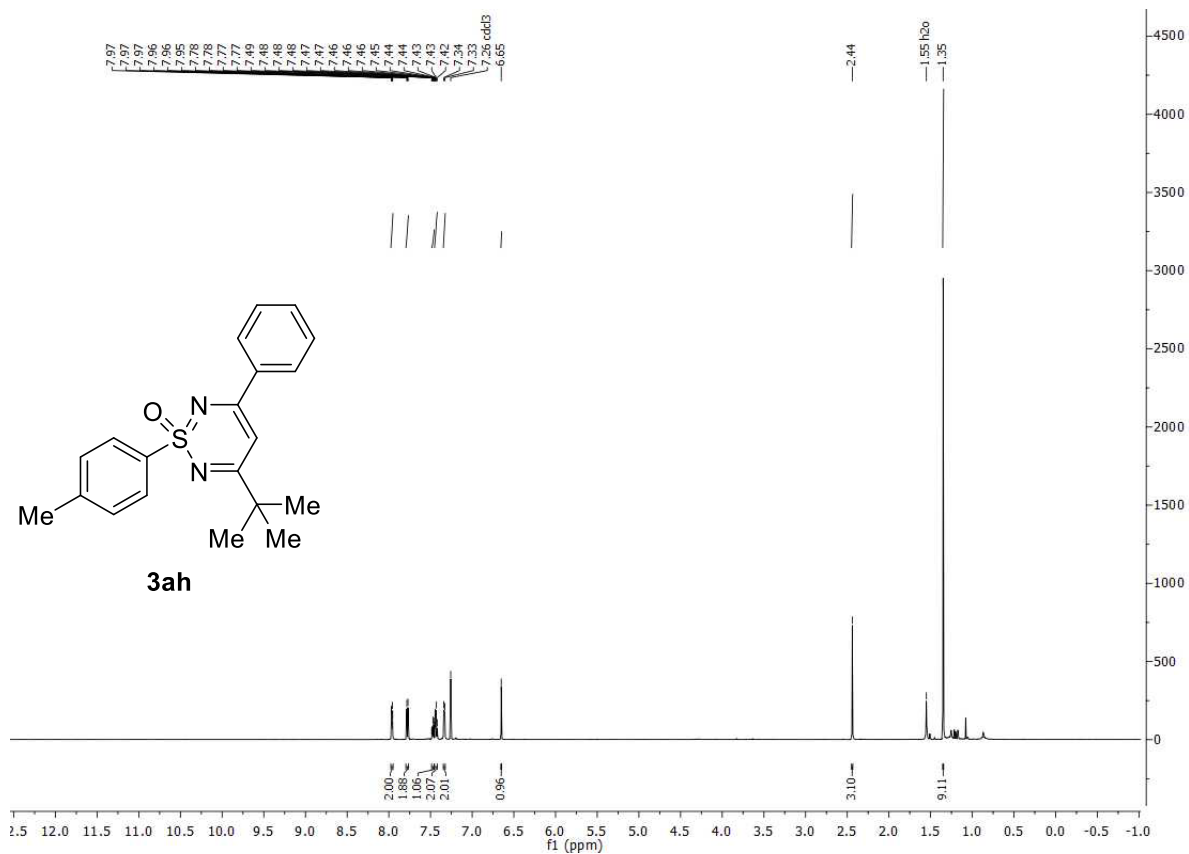

$^{13}\text{C}\{^1\text{H}\}$  NMR (151 MHz,  $\text{CDCl}_3$ ) spectrum of compound **3ah**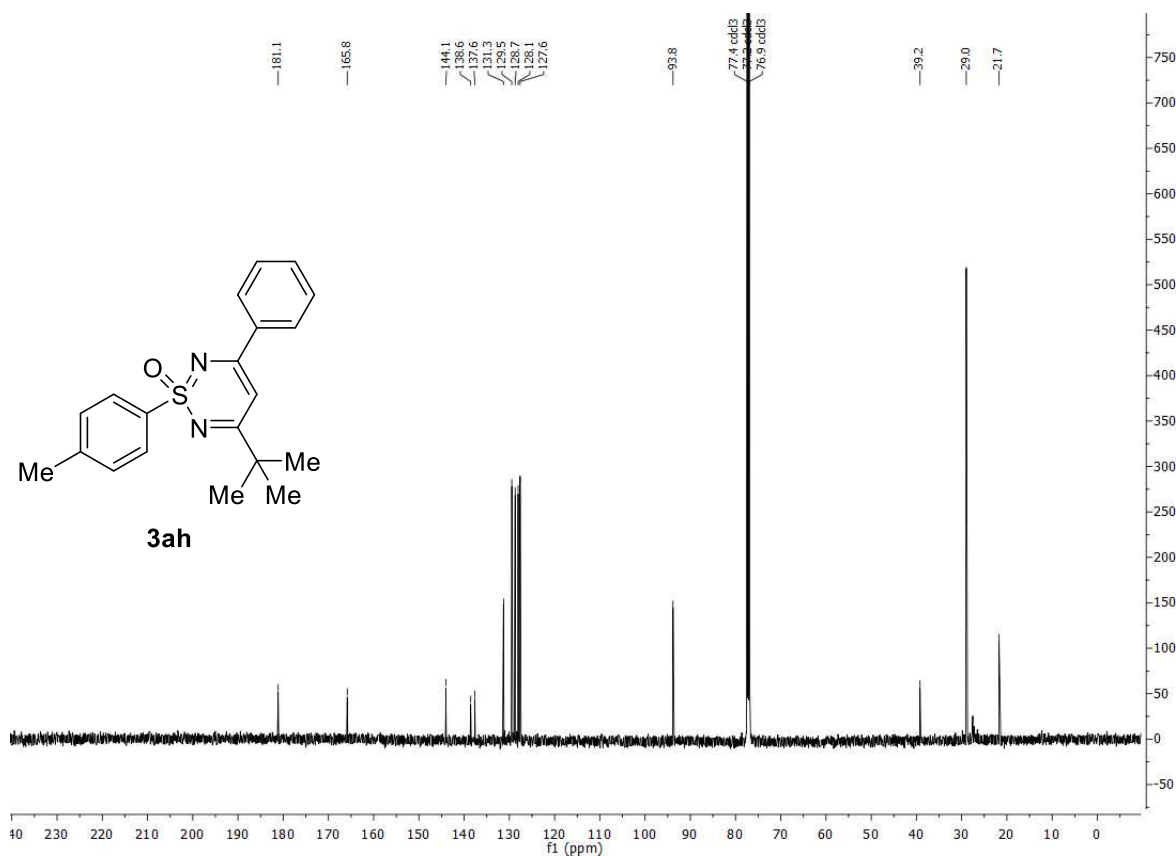 $^1\text{H}$  NMR (400 MHz,  $\text{CDCl}_3$ ) spectrum of compound **3ai**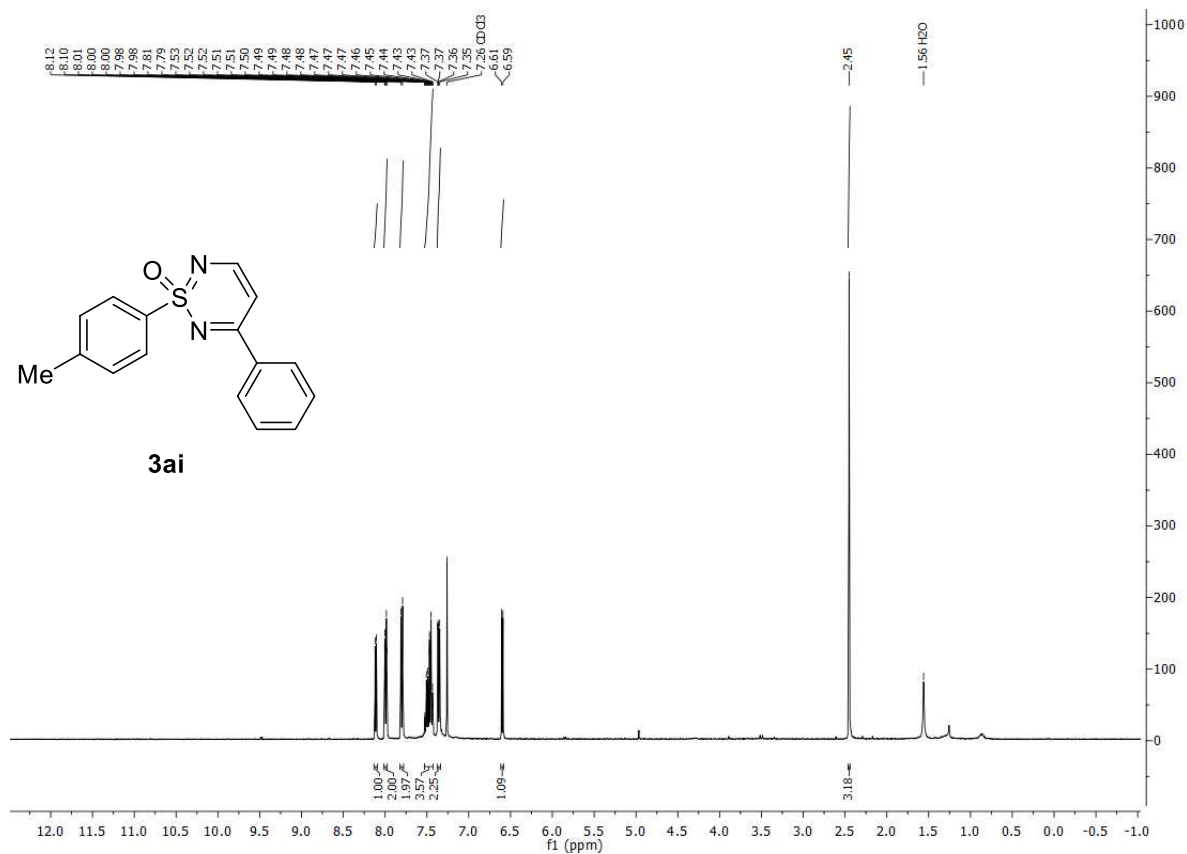

$^{13}\text{C}\{^1\text{H}\}$  NMR (101 MHz,  $\text{CDCl}_3$ ) spectrum of compound **3ai**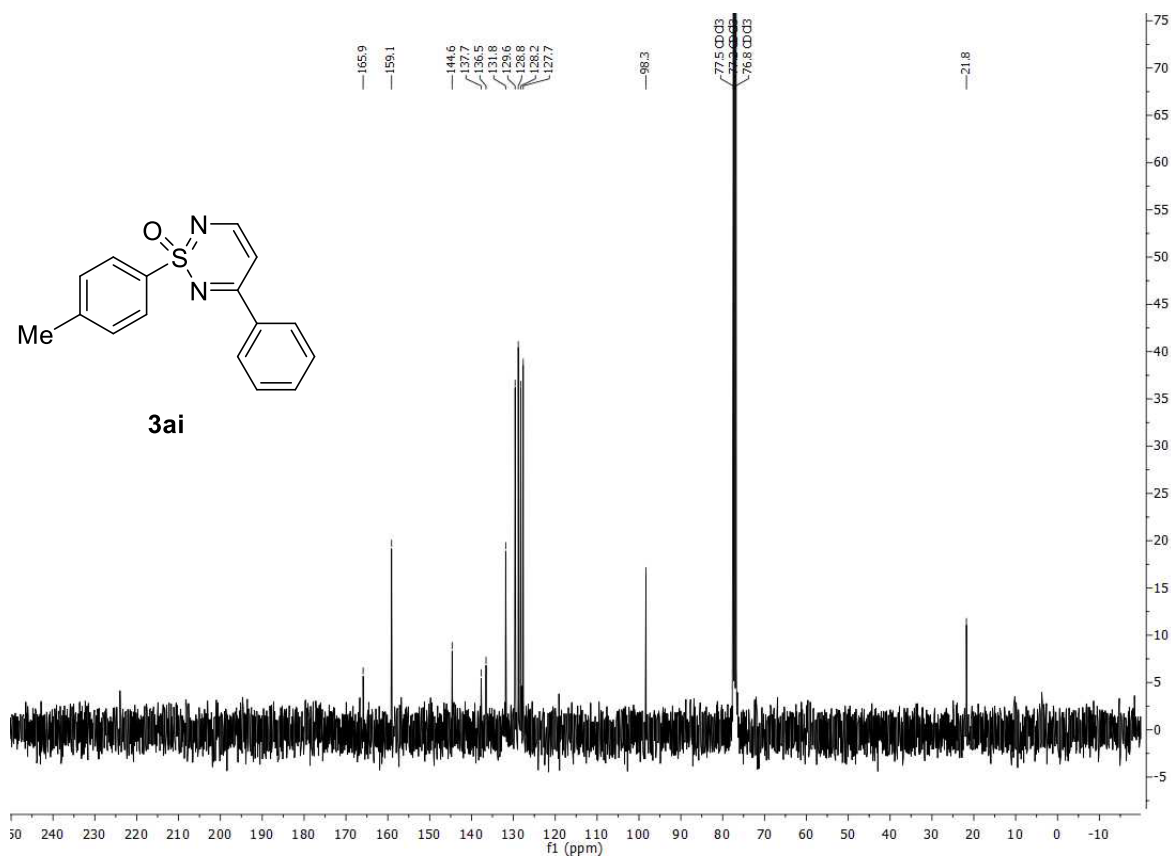 $^1\text{H}$  NMR (400 MHz,  $\text{CDCl}_3$ ) spectrum of compound **3aj**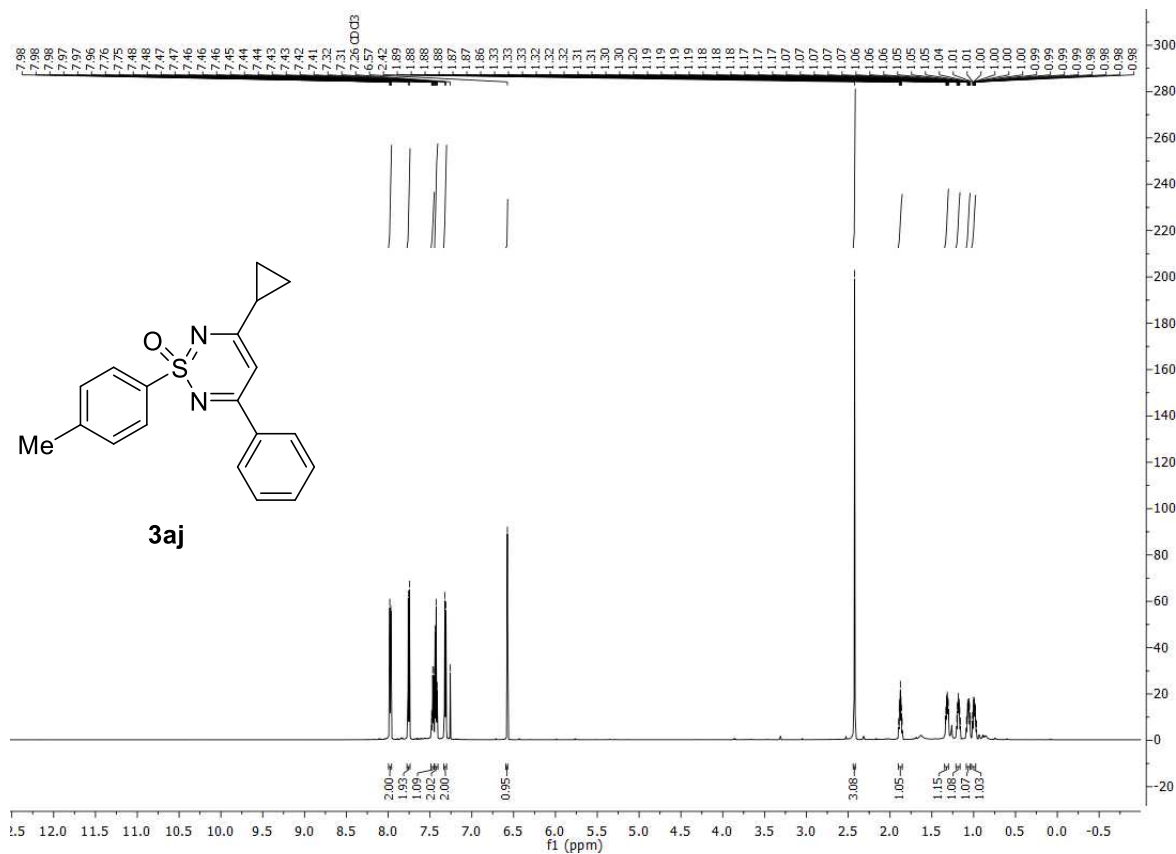

$^{13}\text{C}\{^1\text{H}\}$  NMR (101 MHz,  $\text{CDCl}_3$ ) spectrum of compound **3aj**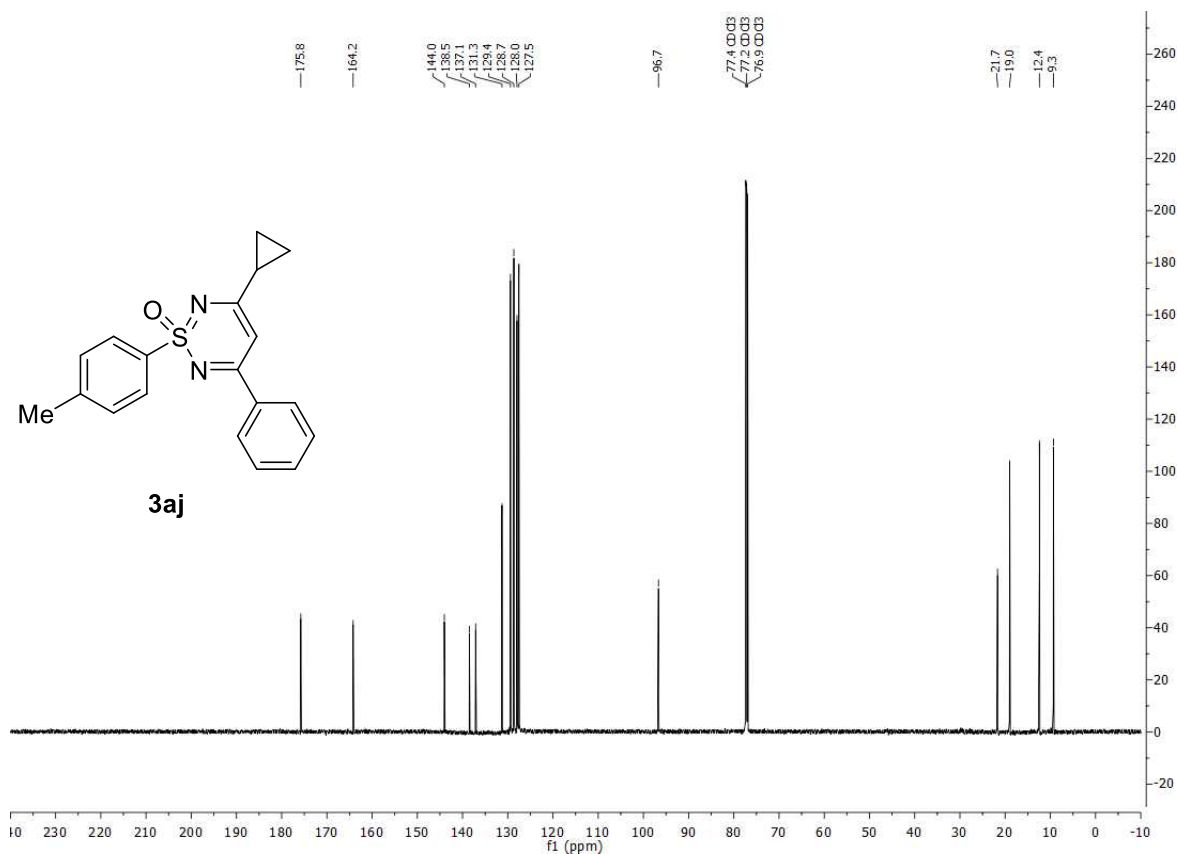 $^1\text{H}$  NMR (600 MHz,  $\text{CDCl}_3$ ) spectrum of compound **3ak**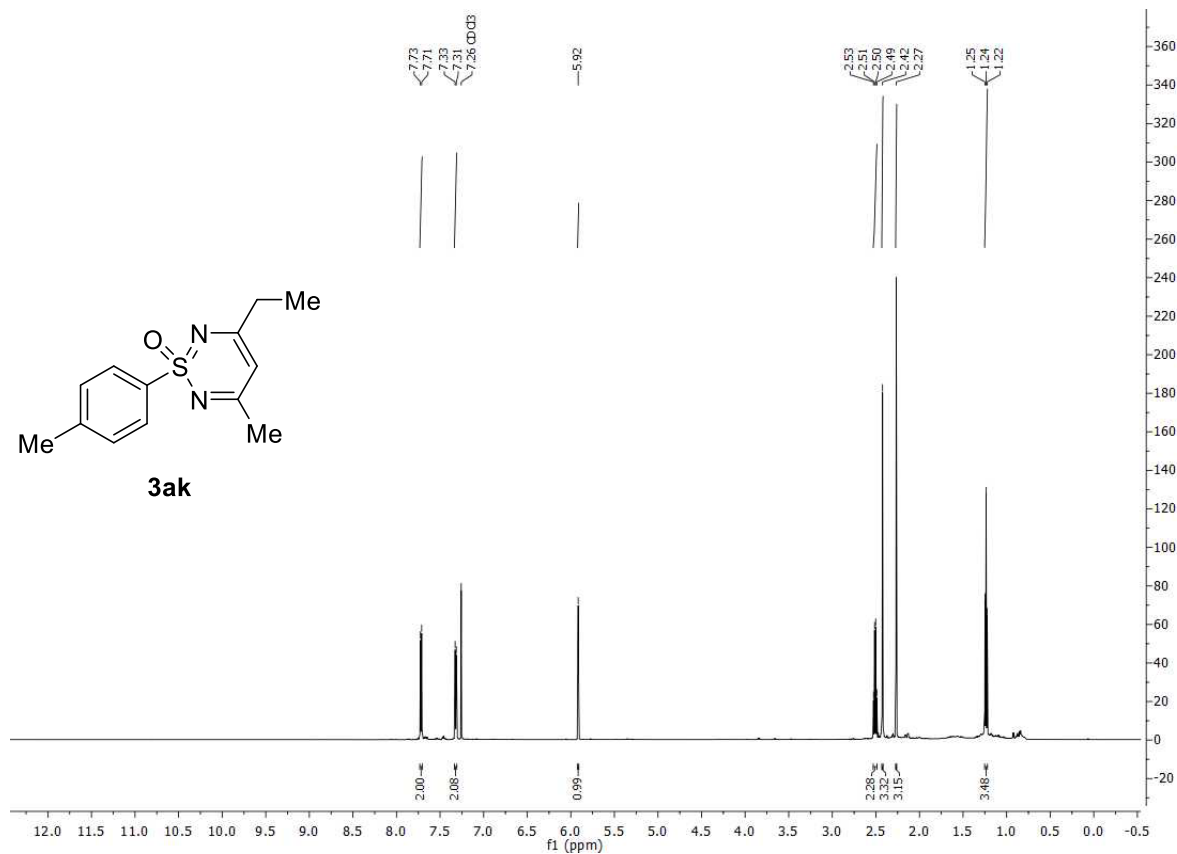

$^{13}\text{C}\{^1\text{H}\}$  NMR (151 MHz,  $\text{CDCl}_3$ ) spectrum of compound **3ak**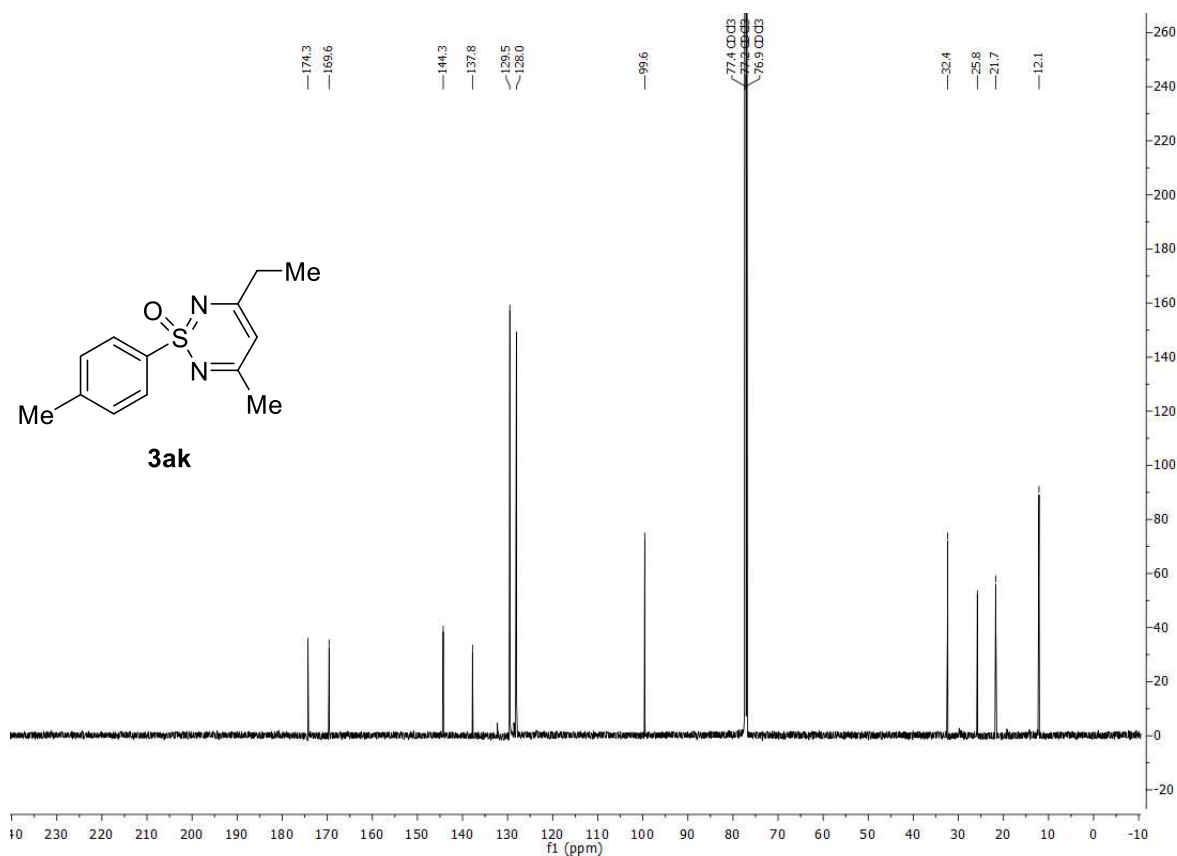 $^1\text{H}$  NMR (600 MHz,  $\text{CDCl}_3$ ) spectrum of compound **3ba**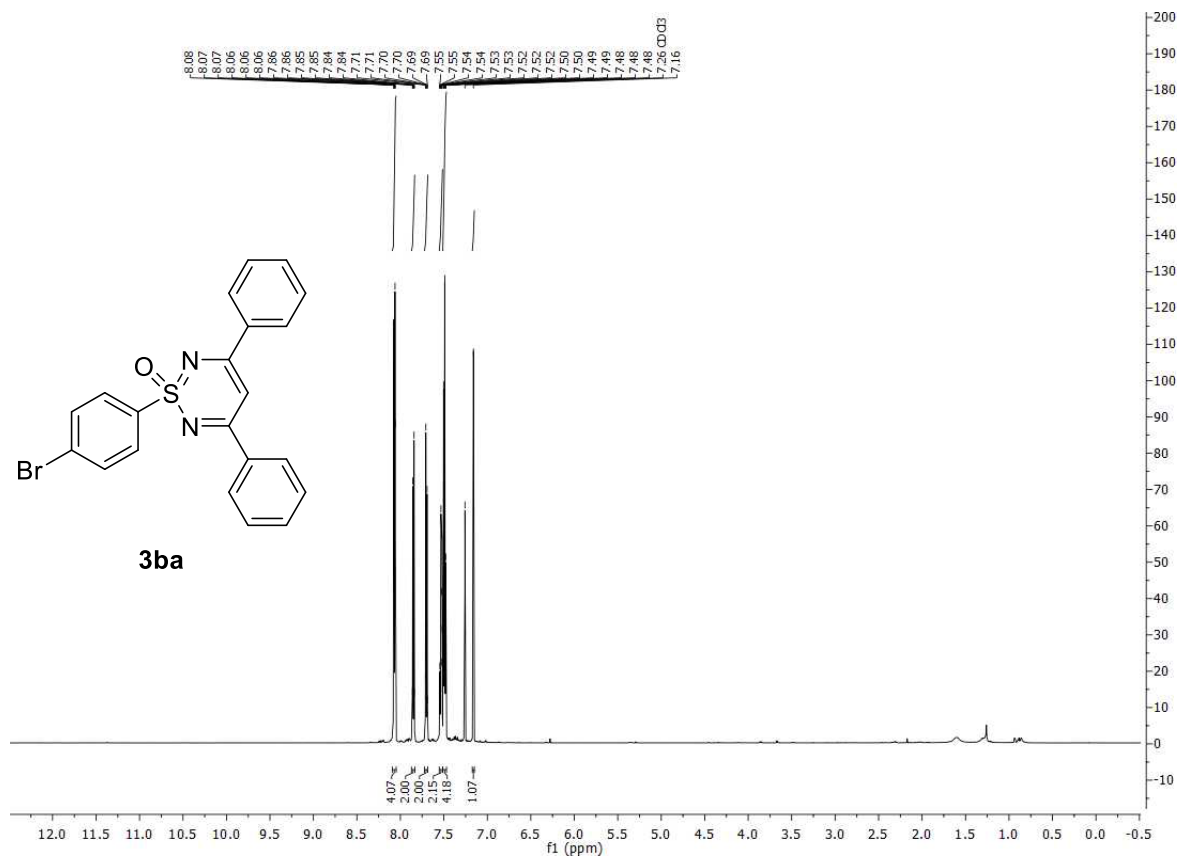

<sup>13</sup>C{<sup>1</sup>H} NMR (151 MHz, CDCl<sub>3</sub>) spectrum of compound **3ba**

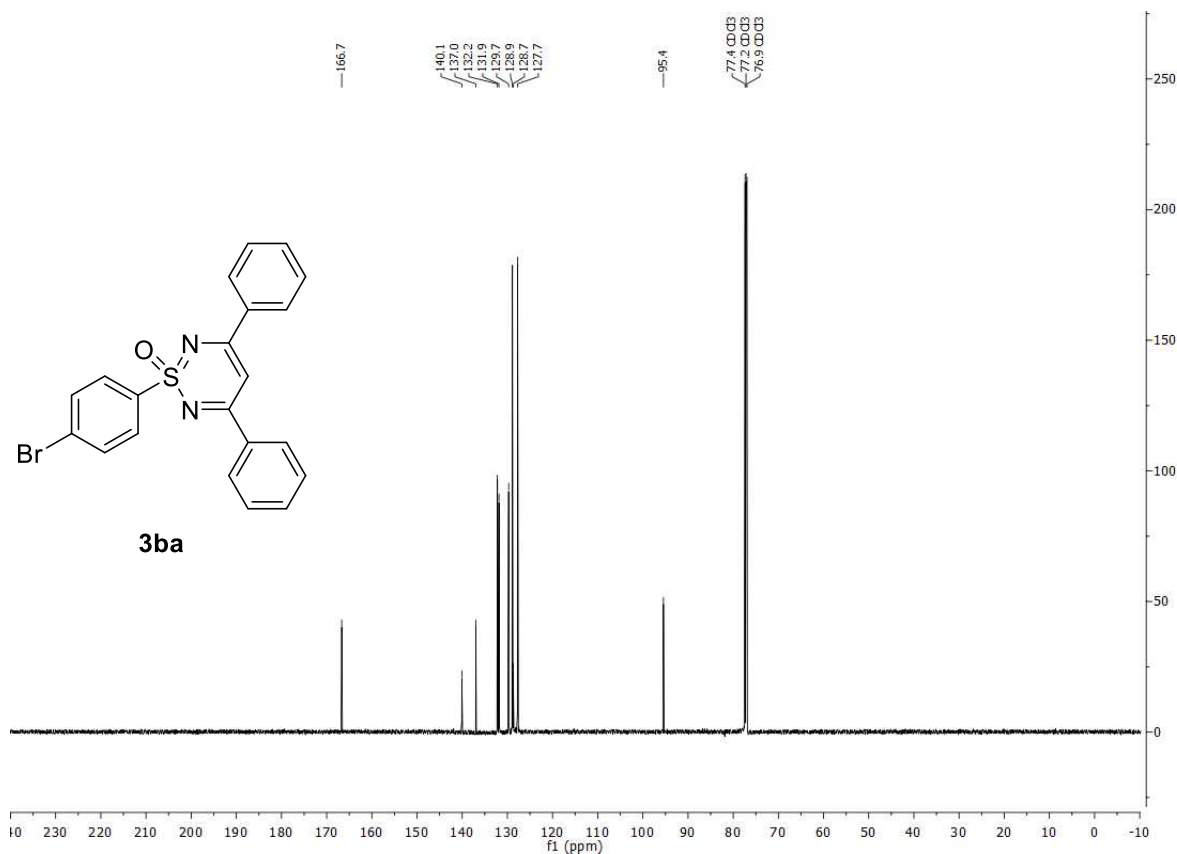

<sup>1</sup>H NMR (400 MHz, CDCl<sub>3</sub>) spectrum of compound **3bb**

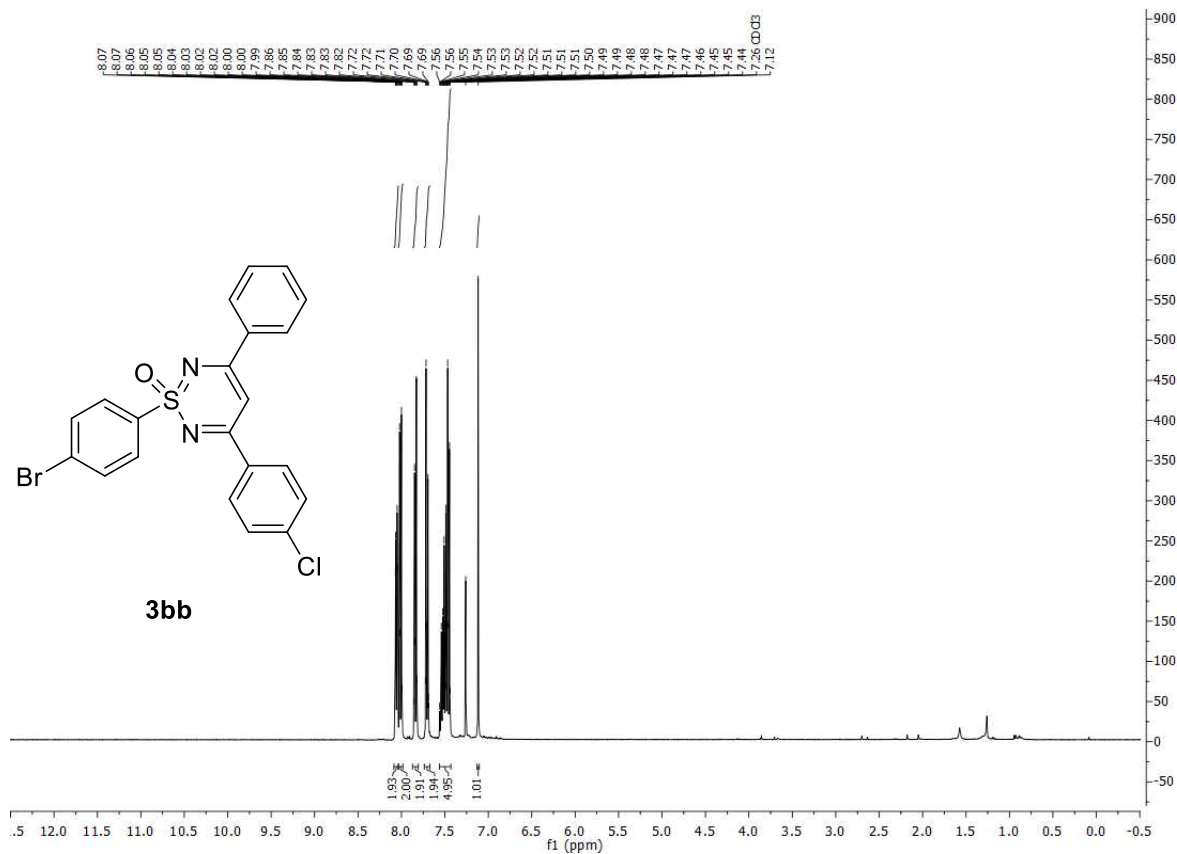

$^{13}\text{C}\{^1\text{H}\}$  NMR (101 MHz,  $\text{CDCl}_3$ ) spectrum of compound **3bb**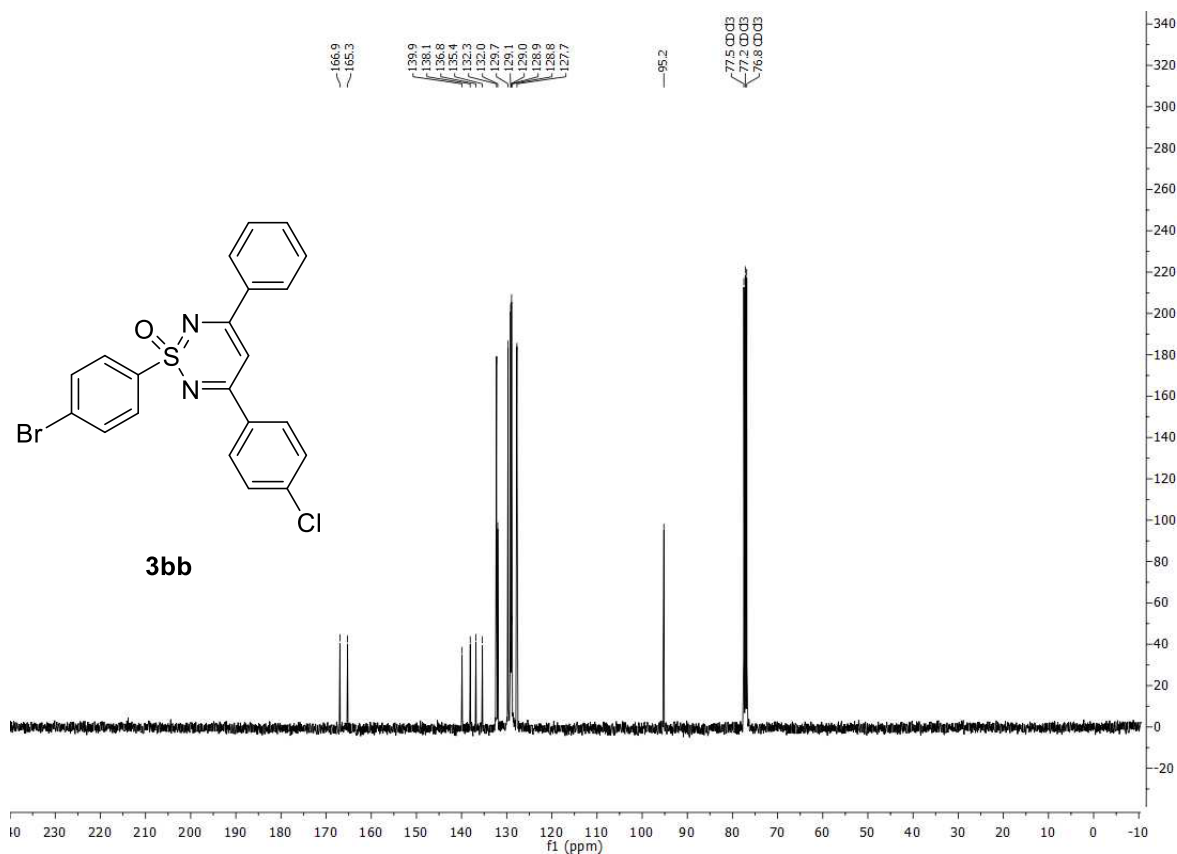 $^1\text{H}$  NMR (400 MHz,  $\text{CDCl}_3$ ) spectrum of compound **3ca**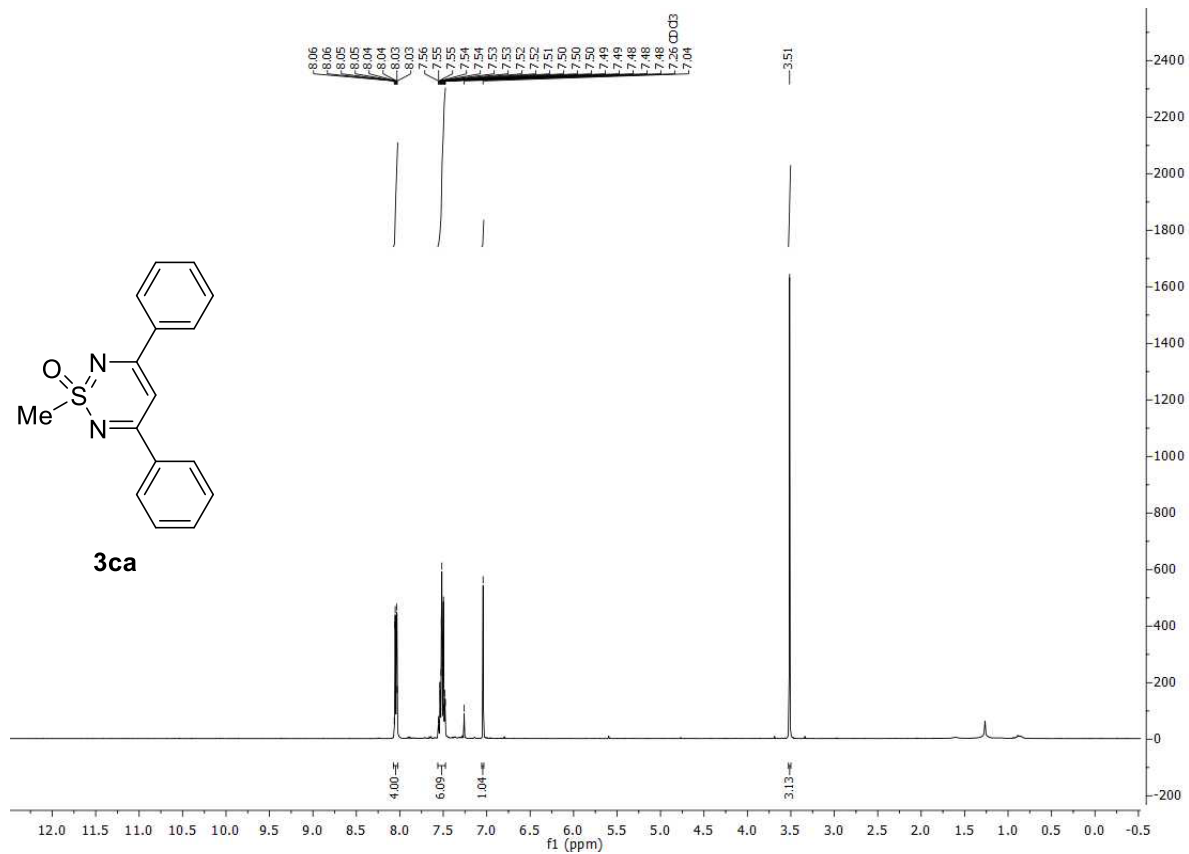

$^{13}\text{C}\{^1\text{H}\}$  NMR (101 MHz,  $\text{CDCl}_3$ ) spectrum of compound **3ca**

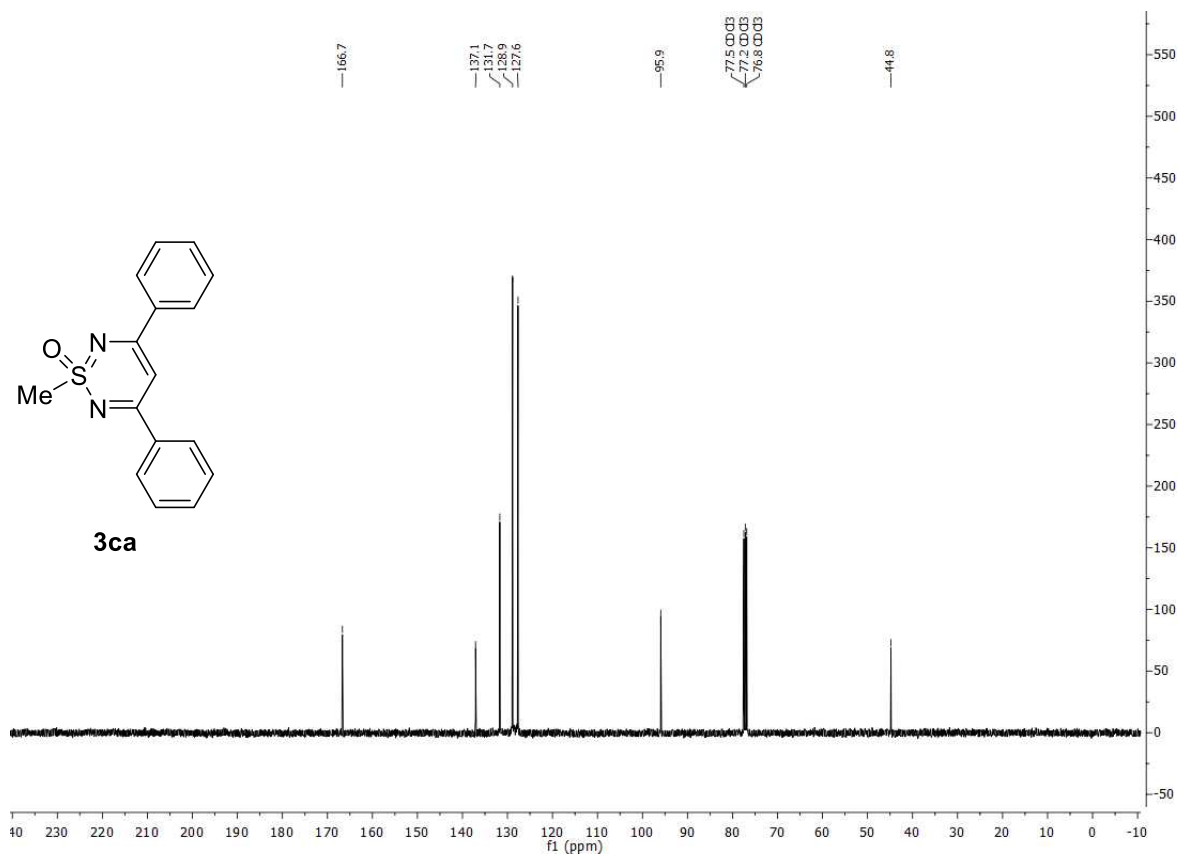

$^1\text{H}$  NMR (400 MHz,  $\text{CDCl}_3$ ) spectrum of compound **3cb**

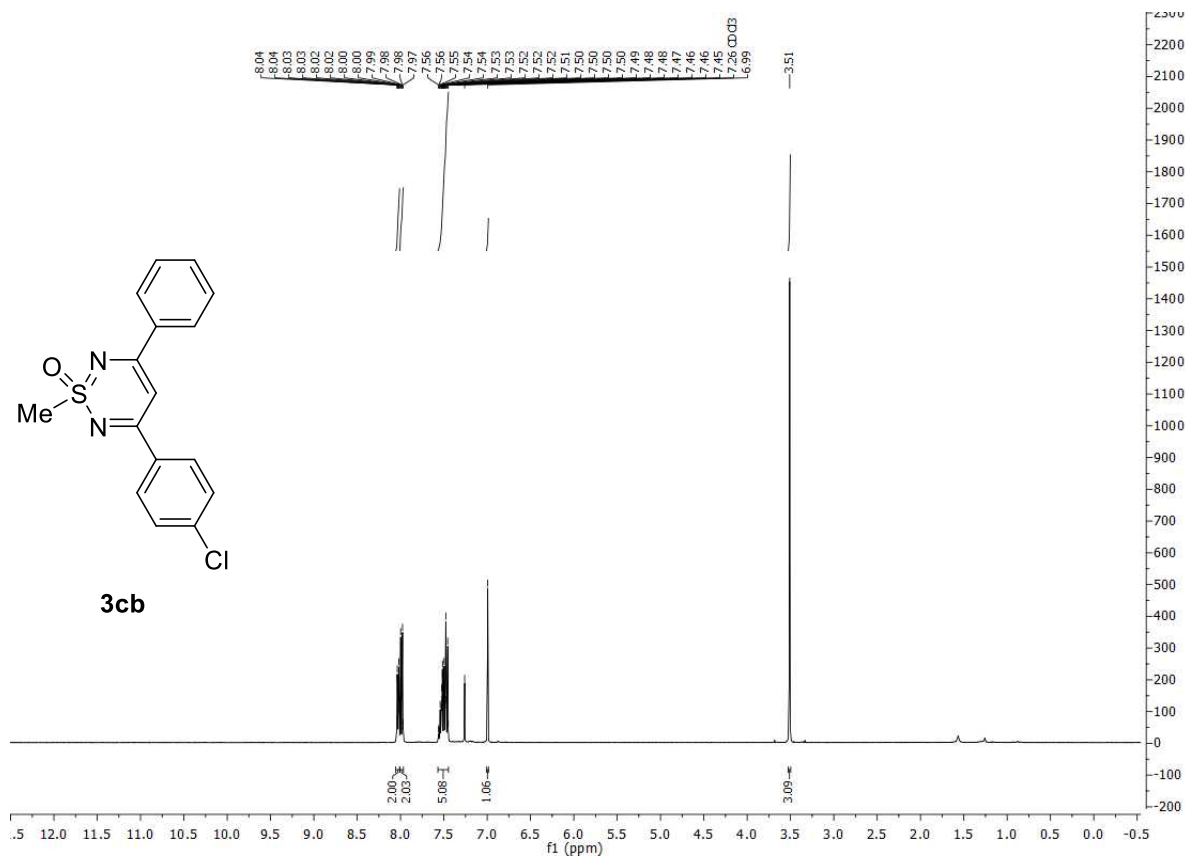

$^{13}\text{C}\{^1\text{H}\}$  NMR (101 MHz,  $\text{CDCl}_3$ ) spectrum of compound **3cb**

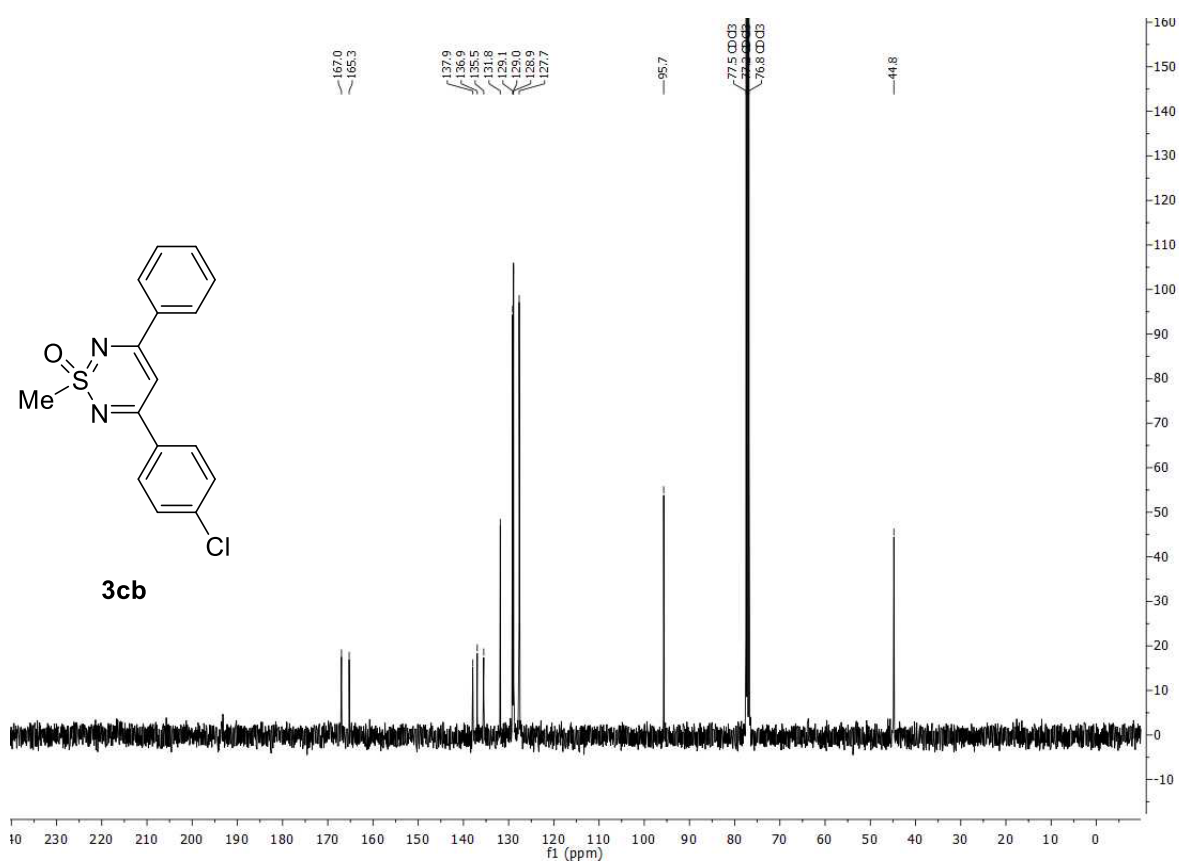

### 3. Photophysical properties

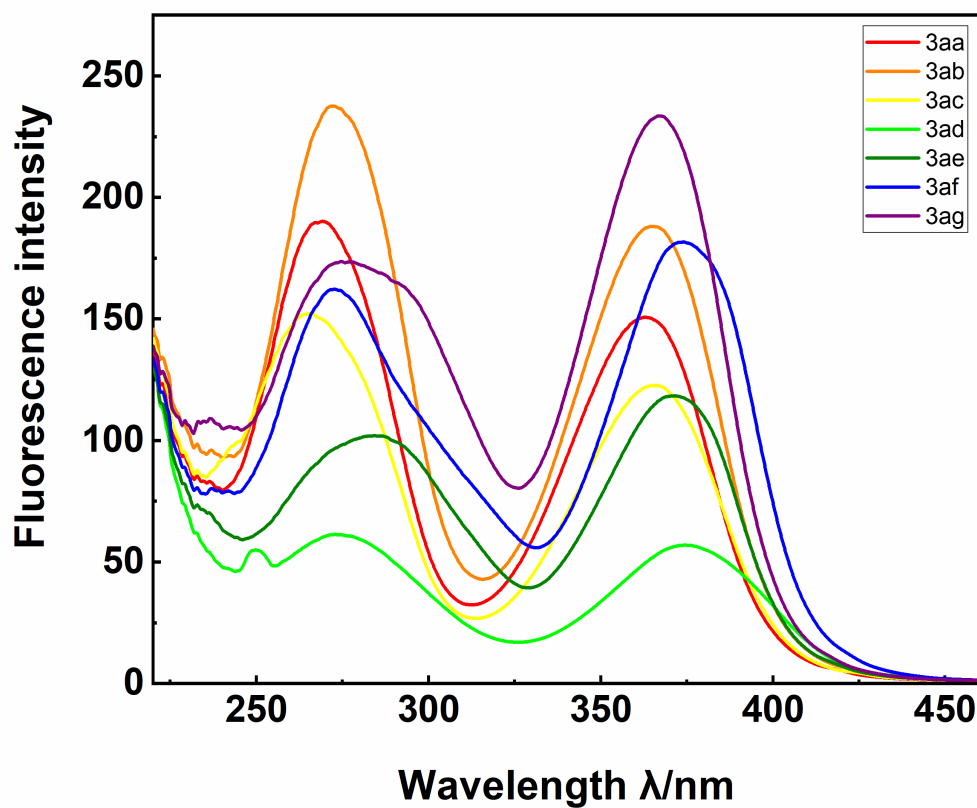

**Figure S2.** Fluorescence excitation spectra of **3aa-3ag** in 1,4-dioxane (0.02 mM), the emission wavelengths were 480 nm for **3aa** and **3ae**, 484 nm for **3ab**, 488 nm for **3ac**, 505 nm for **3ad**, 485 nm for **3af** and 478 nm for **3ag**. Small bands at half wavelengths (around 250 nm) are caused by the second order diffraction of the grating.

**Table S1.** Spectral and photophysical properties of compounds **3aa-3ag** in 1,4-dioxane: absorption maximum  $\lambda_{max}^{abs}$ , absorption coefficient maximum  $\epsilon_{max}$ , fluorescence maximum  $\lambda_{max}^{flo}$ , fluorescence quantum yield  $\phi$  determined using quinine sulfate as a reference.

| <i>Compound</i> | $\lambda_{max}^{abs} / nm$ | $\epsilon_{max} / 10^4 L mol^{-1} cm^{-1}$ | $\lambda_{max}^{flo} / nm$ | $\phi$ |
|-----------------|----------------------------|--------------------------------------------|----------------------------|--------|
| <b>3aa</b>      | 364                        | 1.43                                       | 477                        | 0.23   |
| <b>3ab</b>      | 366                        | 1.72                                       | 478                        | 0.26   |
| <b>3ac</b>      | 367                        | 1.48                                       | 481                        | 0.15   |
| <b>3ad</b>      | 377                        | 1.12                                       | 506                        | 0.14   |
| <b>3ae</b>      | 375                        | 1.94                                       | 477                        | 0.15   |
| <b>3af</b>      | 376                        | 1.79                                       | 479                        | 0.25   |
| <b>3ag</b>      | 368                        | 1.93                                       | 475                        | 0.28   |

The fluorescence quantum yield was determined using quinine sulfate as reference:

$$\phi_f^i = \frac{F^i f_s n_i^2}{F^s f_i n_s^2} \phi_f^s$$

$\phi_f^i$  and  $\phi_f^s$  are the fluorescence quantum yield of the investigated compound in 1,4-dioxane and quinine sulfate in 0.05 M H<sub>2</sub>SO<sub>4</sub>, respectively.  $F^i$  and  $F^s$  are the integrated intensities, and  $f_x$  is the absorption factor ( $f_x = 1 - 10^{-A_x}$  with the absorbance  $A$ ). The refractive indices of the sample and reference solution (1,4-dioxane and water) are  $n_i$  and  $n_s$ , respectively.

#### 4. References

- (1) Schöbel, J.-H.; Passia, M. T.; Wolter, N. A.; Puttreddy, R.; Rissanen, K.; Bolm, C. 1,2,6-Thiadiazine 1-Oxides: Unsaturated Three-Dimensional S,N-Heterocycles from Sulfonimidamides. *Org. Lett.* **2020**, 22, 2702–2706.
- (2) Brouwer, A. M. Standards for photoluminescence quantum yield measurements in solution. *Pure Appl. Chem.* **2011**, 83, 2213–2228.
